# Supplementary material for: Structural optimization of siRNA conjugates for albumin binding achieves effective MCL1-directed cancer therapy
Source: PubMed Central journal article supplement (PMC10881965; doi:10.1038/s41467-024-45609-0), 2024-02-21
Supplement: 41467_2024_45609_MOESM1_ESM.pdf [file 41467_2024_45609_MOESM1_ESM.pdf]

# **Structural Optimization of siRNA Conjugates for Albumin Binding Achieves Effective MCL1-Directed Cancer Therapy**

Ella N. Hoogenboezem<sup>1</sup>, Shruti S. Patel<sup>1</sup>, Justin H. Lo<sup>1,2</sup>, Ashley B. Cavnar<sup>2</sup>, Lauren M. Babb<sup>1</sup>, Nora Francini<sup>1</sup>, Eva F. Gbur<sup>1</sup>, Prarthana Patil<sup>1</sup>, Juan M. Colazo<sup>1,3</sup>, Danielle L. Michell<sup>2</sup>, Violeta M. Sanchez<sup>2</sup>, Joshua T. McCune<sup>1</sup>, Jinqi Ma<sup>1</sup>, Carlisle R. DeJulius<sup>1</sup>, Linus H. Lee, Jonah C. Rosch<sup>4</sup>, Ryan M. Allen<sup>2</sup>, Larry D. Stokes<sup>1</sup>, Jordan L. Hill<sup>1</sup>, Kasey C. Vickers<sup>2,5</sup>, Rebecca S. Cook<sup>1</sup>, and Craig L. Duvall<sup>1\*</sup>

1. Department of Biomedical Engineering, Vanderbilt University, Nashville, TN
2. Department of Medicine, Vanderbilt University Medical Center, Nashville, TN
3. Medical Scientist Training Program, Vanderbilt University School of Medicine, Nashville, TN
4. Department of Chemical and Biomolecular Engineering, Vanderbilt University, Nashville, TN
5. Department of Molecular Physiology and Biophysics, Vanderbilt University, Nashville, TN

## **Supplementary Information**

## Supplementary Methods

### **Synthesis of siRNA conjugate variant covalently bound to albumin**

Conjugate covalently bound to albumin was synthesized by first reacting azido-PEG<sub>3</sub>-maleimide (Click Chemistry Tools) with the free thiols on human (1 free SH) or mouse (2 free SH). Albumin was dissolved in PBS with 0.5M EDTA to a final concentration of 10 mM. Anhydrous DMF was used to solubilize and activate azido-PEG<sub>3</sub>-maleimide. DBCO-modified siRNA duplex in PBS was reacted at a 1:1 ratio of DBCO groups:free SH groups and allowed to incubate at room temperature for 4 hours. To remove any siRNA that did not react with albumin, or reacted only with the azido linker, the resulting solution underwent 10 rounds of centrifugation in a 30 kDa cutoff Amicon filter at 14,000 xg for 10 minutes for each round. Conjugation was confirmed by gel electrophoresis of precursor DBCO-siRNA alongside resulting siRNA-DBCO-albumin.

### **Synthesis of PFP-modified lipids**

Oleic acid was dissolved at 1mM in anhydrous dichloromethane and placed on ice. A 10x molar excess of triethylamine was then added followed by a 3x molar excess of pentafluorophenyl trifluoroacetate. A similar procedure was used for octadecanoic acid. The lipid was dissolved at 0.5 mM in anhydrous dichloromethane and placed on ice. A 2x molar excess of triethylamine was then added followed by a 0.5x molar excess of pentafluorophenyl trifluoroacetate added dropwise.

For both lipids, the reaction vessel was removed from ice after 15 minutes and allowed to equilibrate to room temperature. The reaction mixture was then stirred for 4h followed by storage at -20C. The crude product was purified by silica gel column chromatography and eluted with solvents with a gradient from 100% hexane to 100% ethyl acetate to yield compounds 1 and 2. The compounds were then rotary evaporated to dryness and characterized by <sup>1</sup>H- and <sup>19</sup>F-NMR spectroscopy.

### **Synthesis of lipid-variant siRNA conjugates**

Amine-terminated oligonucleotides were speed vacuumed to dryness and desalted to remove MMT groups. Oligonucleotides were then lyophilized followed by reconstitution in 0.1 sodium tetraborate (pH 8.5) to a concentration of 500 μM. PFP-modified lipid was dissolved into a mixture of acetonitrile, DMSO, and triethylamine (70:29:1 by volume) at a concentration of 7 μM. Aqueous oligonucleotide was added dropwise to the organic solution for a 1:40 molar ratio of oligonucleotide-amine:amine-reactive lipid (approximately 25% 0.1M sodium tetraborate, 75% organic mixture). The solution was stirred overnight and desalted prior to purification and characterization, as detailed in the main manuscript methods section.

**Supplementary Table 1: siRNA sequence and modification details**

|                                                                                                                                                        | <b>Sequence (5' to 3')</b>                                                                                                           |
|--------------------------------------------------------------------------------------------------------------------------------------------------------|--------------------------------------------------------------------------------------------------------------------------------------|
| Luciferase (Luc) Antisense                                                                                                                             | (PHO) (OMeU)*(fU)*(OMeC) (fA) (OMeU) (fU) (OMeA) (fU) (OMeC) (fA) (OMeG) (fU) (OMeG) (fC) (OMeA) (fA) (OMeU)*(fU)*(OMeG)             |
| Luc Sense                                                                                                                                              | (fC)*(OMeA)*(fA) (OMeU) (fU) (OMeG) (fC) (OMeA) (fC) (OMeU) (fG) (OMeA) (fU) (OMeA) (fA) (OMeU) (fG)*(OMeA)*(fA)                     |
| Scrambled (Scr) Antisense                                                                                                                              | (PHO) (OMeG)*(fU)*(OMeA) (fU) (OMeU) (fA) (OMeU) (fA) (OMeC) (fG) (OMeC) (fG) (OMeA) (fU) (OMeU) (fA) (OMeA) (fC) (OMeG)*(fA)*(OMeC) |
| Scr Sense                                                                                                                                              | (fC)*(OMeG)*(fU) (OMeU) (fA) (OMeA) (fU) (OMeC) (fG) (OMeC) (fG) (OMeU) (fA) (OMeU) (fA) (OMeA) (fU)*(OMeA)*(fC)                     |
| Cy5-labeled Luc Antisense                                                                                                                              | (Cy5) (OMeU)*(fU)*(OMeC) (fA) (OMeU) (fU) (OMeA) (fU) (OMeC) (fA) (OMeG) (fU) (OMeG) (fC) (OMeA) (fA) (OMeU)*(fU)*(OMeG)             |
| Biotin-TEG-labeled Luc Antisense                                                                                                                       | (BTN-TEG)*(OMeU)*(fU)*(OMeC) (fA) (OMeU) (fU) (OMeA) (fU) (OMeC) (fA) (OMeG) (fU) (OMeG) (fC) (OMeA) (fA) (OMeU)*(fU)*(OMeG)         |
| Mcl-1 Antisense                                                                                                                                        | (fC)*(OMeA)*(fU)(OMeC)(fG)(OMeA)(fA)(OMeC)(fC)(OMeA)(fU)(OMeU)(fA)(OMeG)(fC)(OMeA)(fG)*(OMeA)*(fA)                                   |
| Mcl-1 Sense                                                                                                                                            | (PHO)(OMeU)*(fU)*(OMeC) (fU)(OMeG)(fC) (OMeU)(fA)(OMeA) (fU)(OMeG)(fG) (OMeU)(fU)(OMeC) (fG)(OMeA)*(fU)*(OMeG)                       |
| <i>Phosphorothioate bond (X)*(X)</i><br><i>Phosphodiester bond (X) (X)</i><br><i>2'F substituted base (fX)</i><br><i>2'OMe substituted base (OMeX)</i> |                                                                                                                                      |

**Supplementary Table 2: Pharmacokinetic parameters for full siRNA conjugate library determined from intravital microscopy**

|                       | $t_{1/2}$<br>(min) | $AUC_{0-35m}$<br>( $\mu\text{g}\cdot\text{min}/\text{mL}$ ) | CL<br>( $\text{mL}/\text{min}$ ) |
|-----------------------|--------------------|-------------------------------------------------------------|----------------------------------|
|                       | 14 ± 3.5           | 210 ± 25                                                    | 0.069 ± 0.012                    |
|                       | 28 ± 12            | 410 ± 42                                                    | 0.025 ± 0.0079                   |
|                       | 27 ± 5.3           | 390 ± 25                                                    | 0.026 ± 0.0046                   |
| EG<br>Variants        | 33 ± 6.6           | 416 ± 55                                                    | 0.028 ± 0.0059                   |
|                       | 36 ± 4.6           | 450 ± 15                                                    | 0.019 ± 0.0022                   |
|                       | 64 ± 23            | 470 ± 52                                                    | 0.012 ± 0.0032                   |
|                       | 37 ± 6.6           | 440 ± 36                                                    | 0.019 ± 0.0043                   |
|                       | 37 ± 12            | 430 ± 50                                                    | 0.020 ± 0.0060                   |
| PS<br>Variants        | 15 ± 1.5           | 300 ± 36                                                    | 0.047 ± 0.0070                   |
|                       | 67 ± 32            | 490 ± 35                                                    | 0.012 ± 0.0070                   |
| Branching<br>Variants | 41 ± 13            | 450 ± 27                                                    | 0.018 ± 0.0050                   |
|                       | 47 ± 21            | 469 ± 64                                                    | 0.017 ± 0.0073                   |
| Lipid<br>Variants     | 34 ± 26            | 391 ± 121                                                   | 0.029 ± 0.016                    |

**a** $si_{sense}$ 

Theoretical molecular weight: 6264 Da

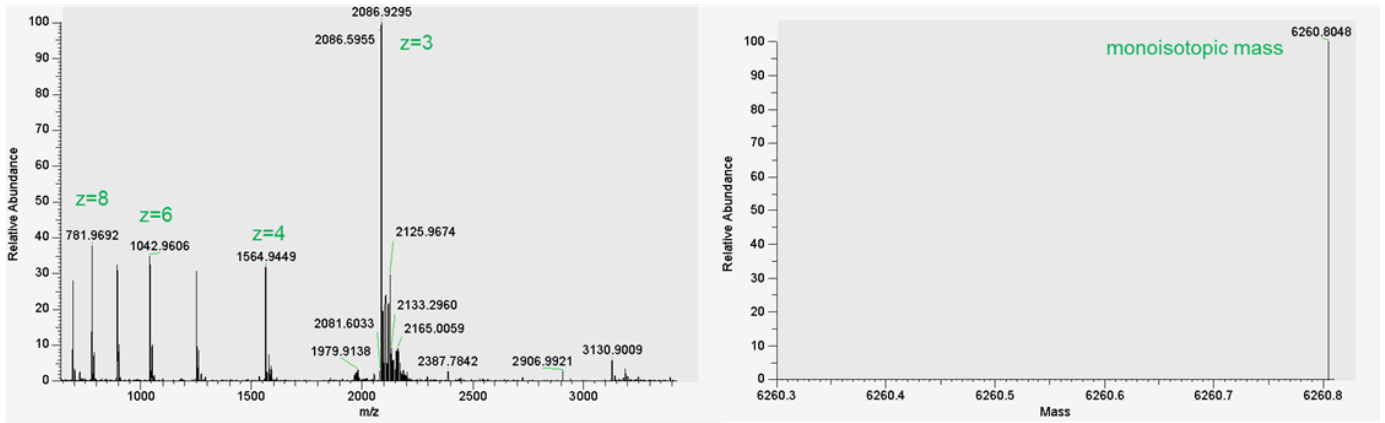**b** $si_{antisense}$ -TEG-Biotin

Theoretical molecular weight: 6920 Da

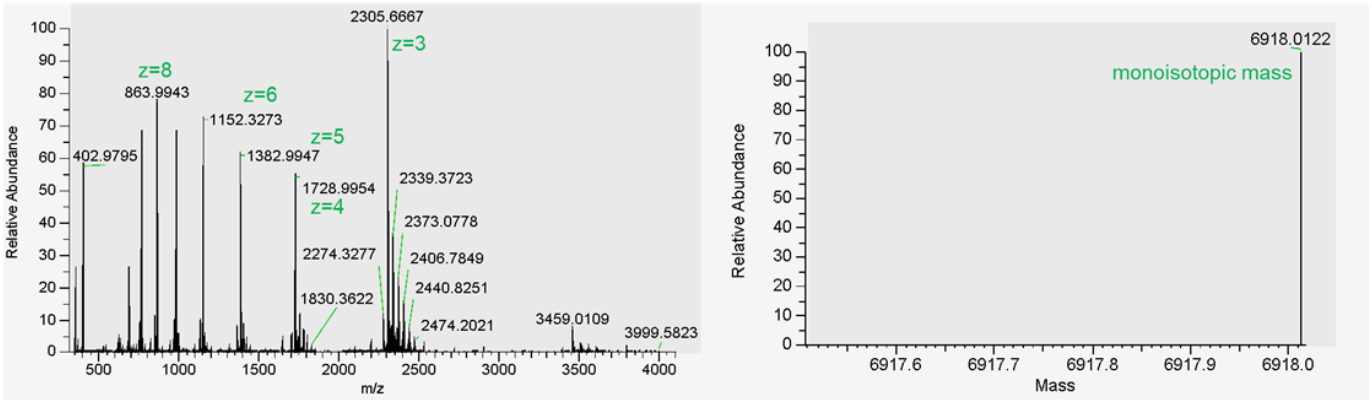**c** $si_{antisense}$ -Cyanine 5

Theoretical molecular weight: 6740 Da

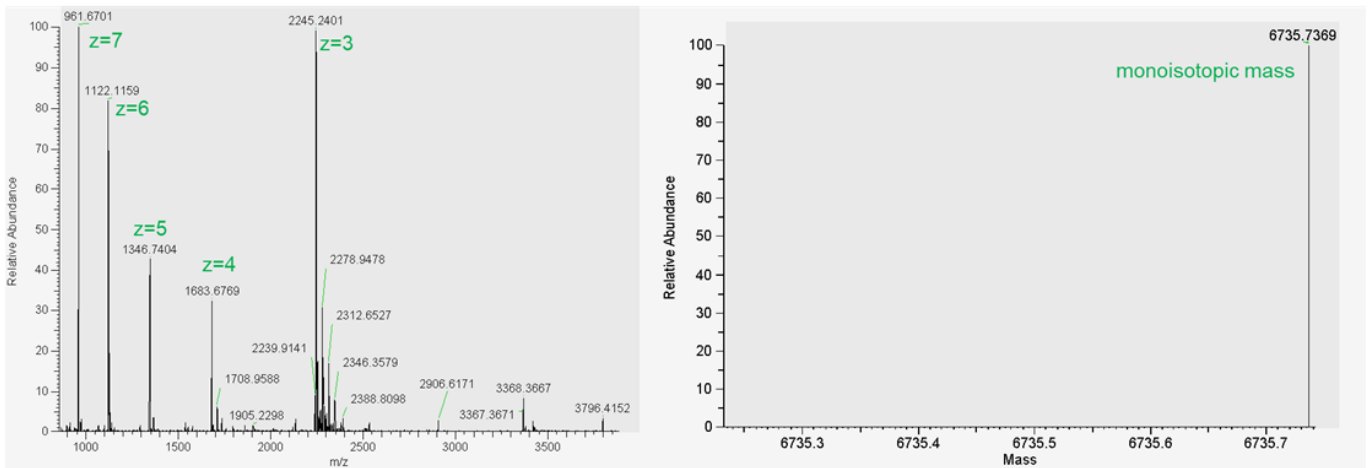

**d**

si-L<sub>1</sub>  
Theoretical molecular weight: 6612 Da

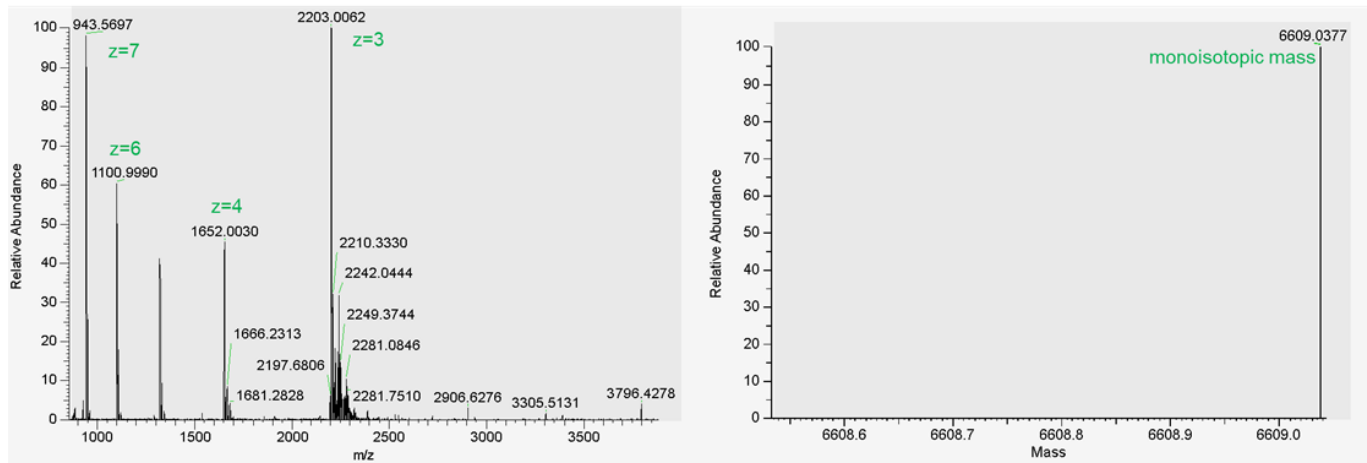**e**

si-EG<sub>3</sub>-chol  
Theoretical molecular weight: 6963 Da

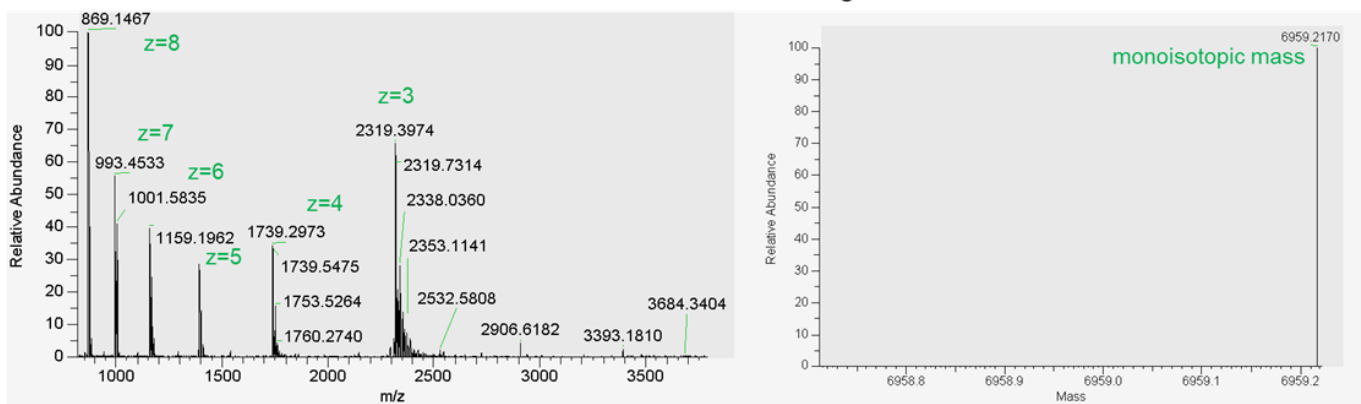**f**

si-(EG<sub>0</sub>L)<sub>2</sub>  
Theoretical molecular weight: 7126 Da

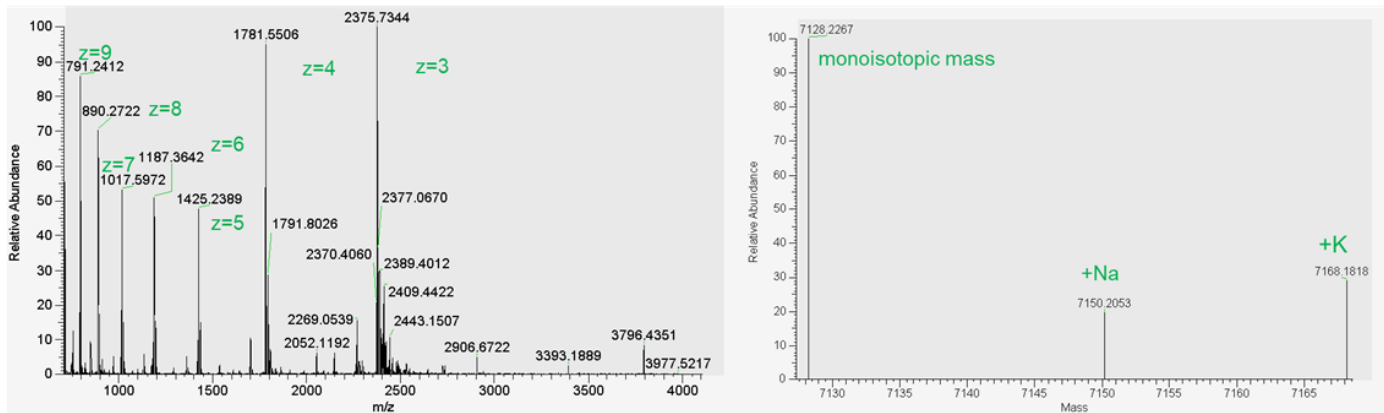

**g**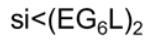

Theoretical molecular weight: 7846 Da

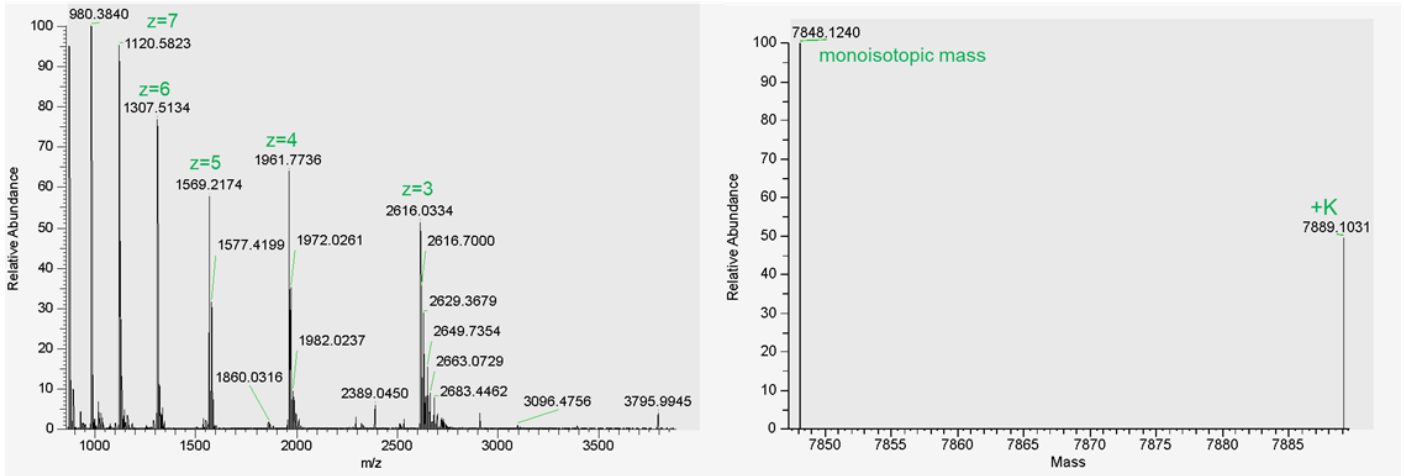**h**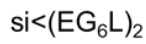

Theoretical molecular weight: 7846 Da

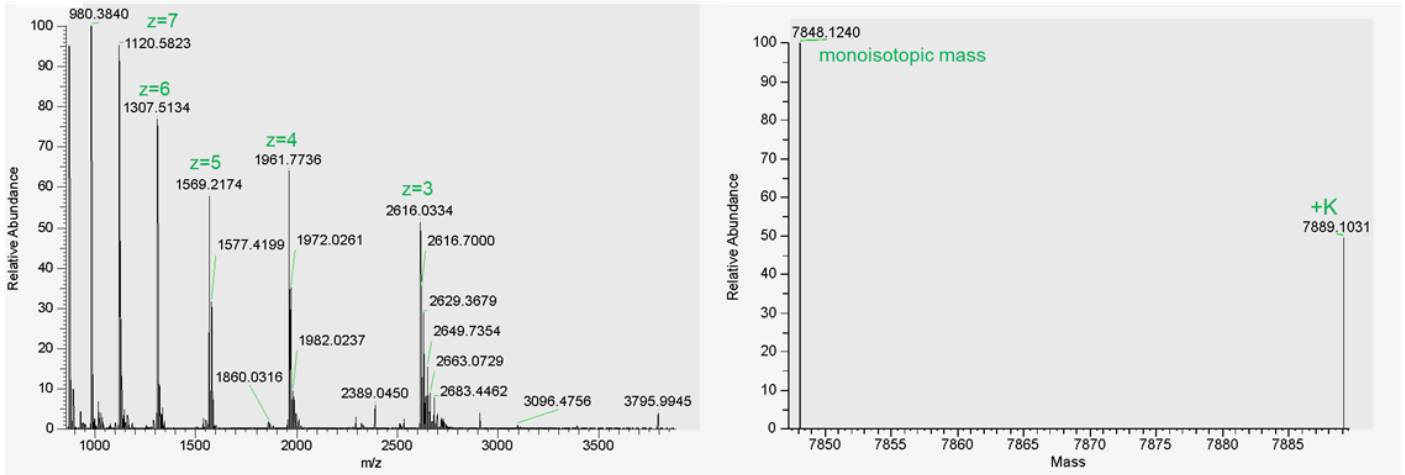**i**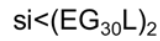

Theoretical molecular weight: 10,735 Da

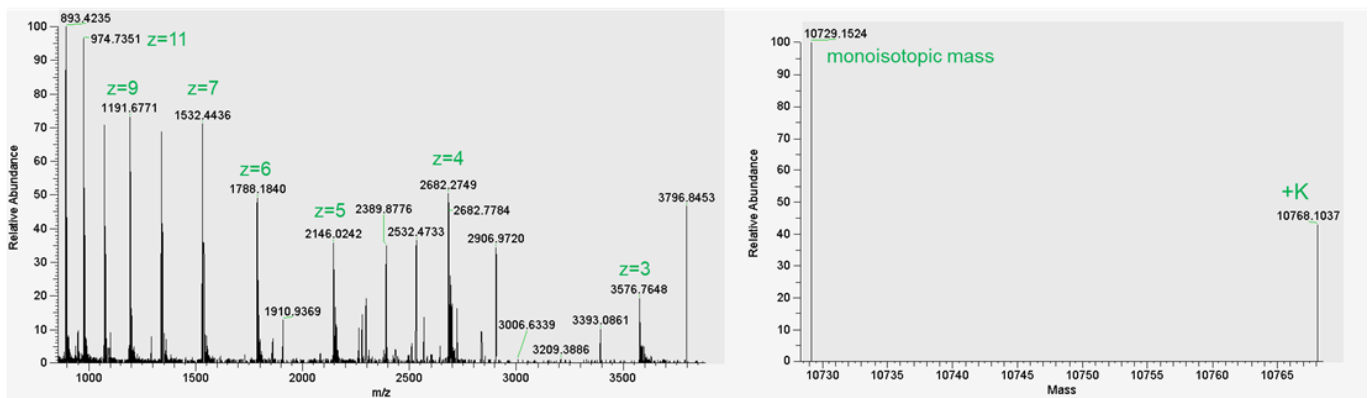

**j**

si-(EG<sub>18</sub>L)<sub>2</sub>No 5' PS or Binder PS  
 Theoretical molecular weight: 9115 Da

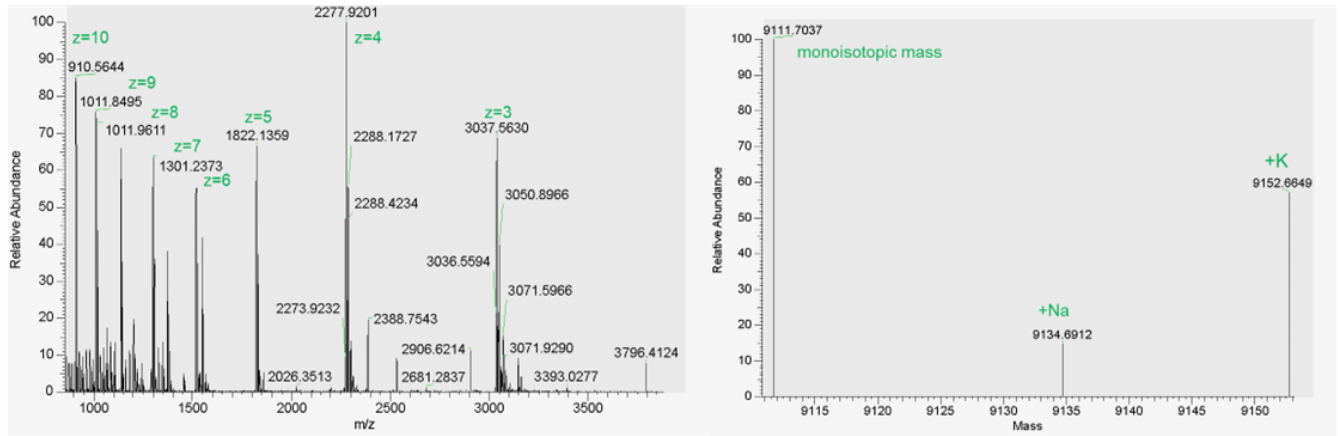**k**

si-(EG<sub>18</sub>L)<sub>2</sub>No 5' PS  
 Theoretical molecular weight: 9260 Da

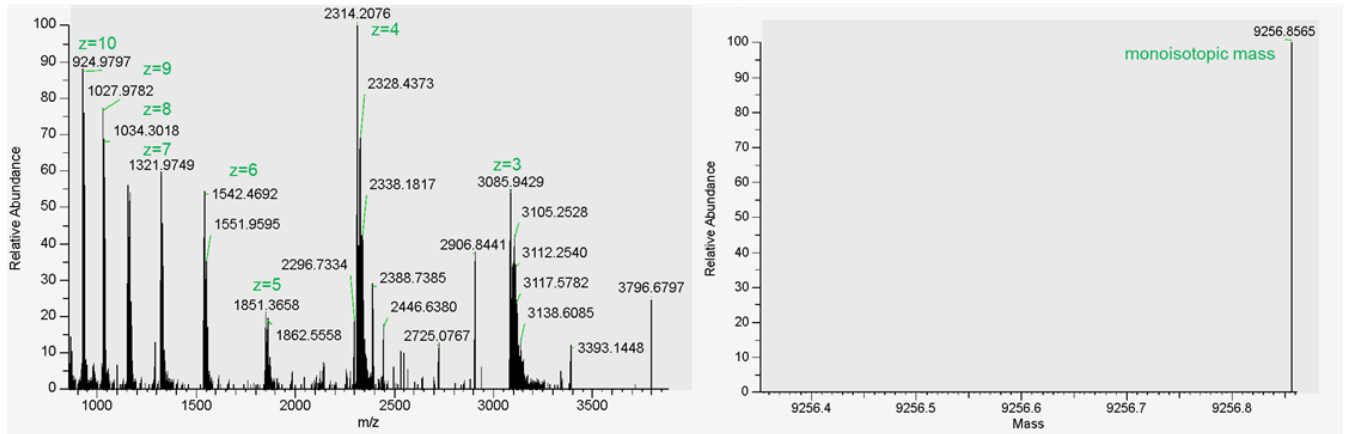**l**

si-EG<sub>18</sub><L<sub>2</sub>  
 Theoretical molecular weight: 8211 Da

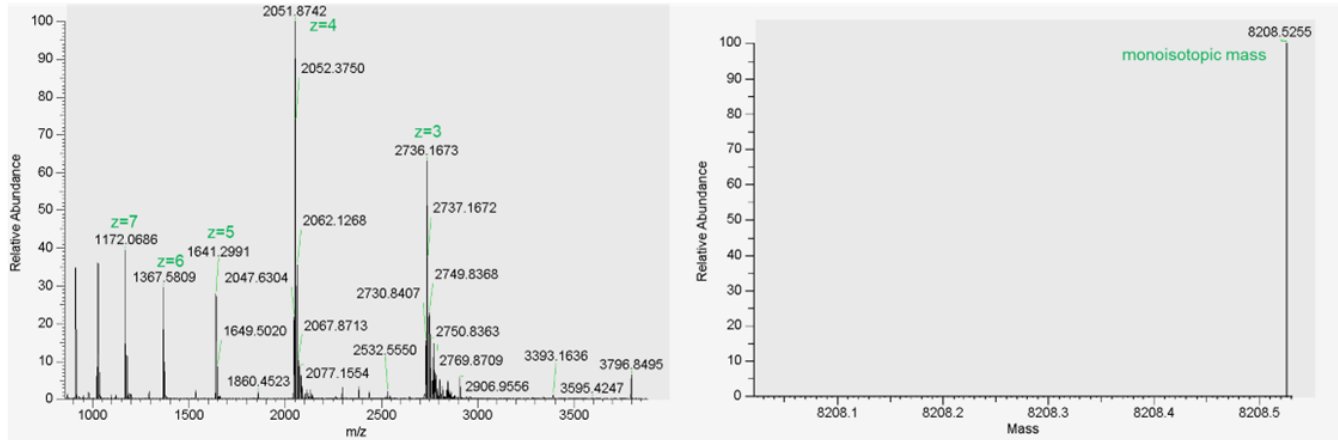



**m**

si-EG<sub>36</sub><L<sub>2</sub>  
 Theoretical molecular weight: 9292 Da

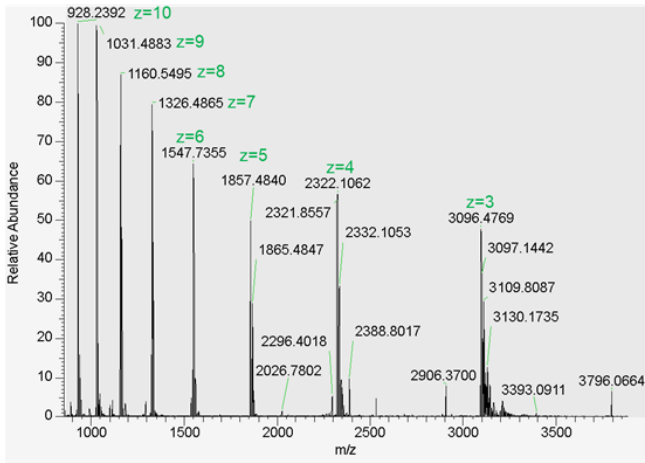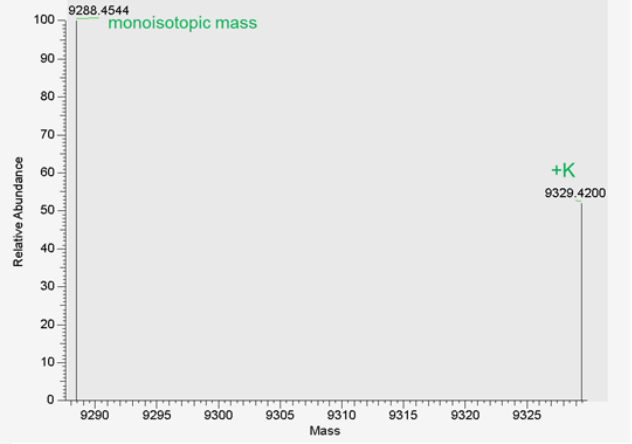**n**

si<(EG<sub>18</sub>L<sub>unsaturated</sub>)<sub>2</sub>  
 Target molecular weight 9490

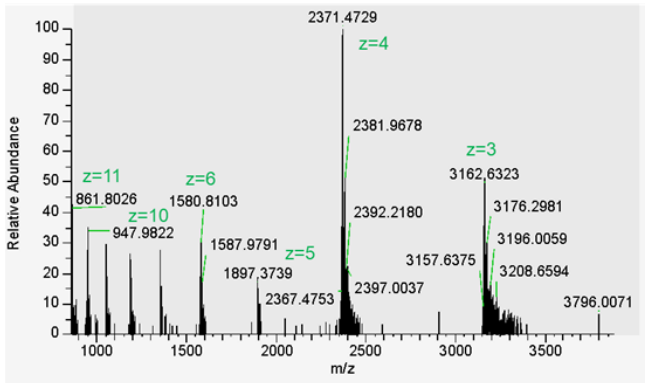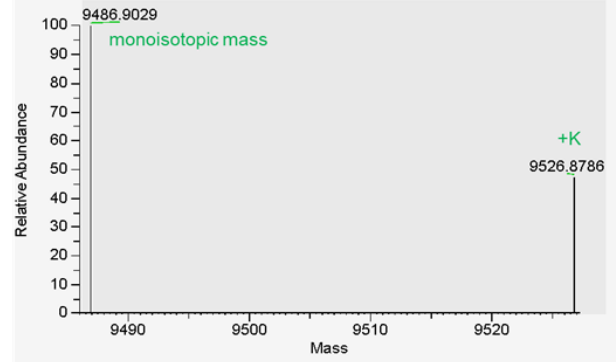**o**

si<(EG<sub>18</sub>L<sub>dialcid</sub>)<sub>2</sub>  
 Target molecular weight 9554

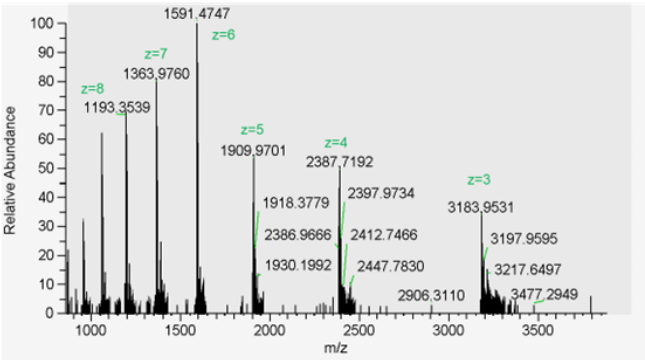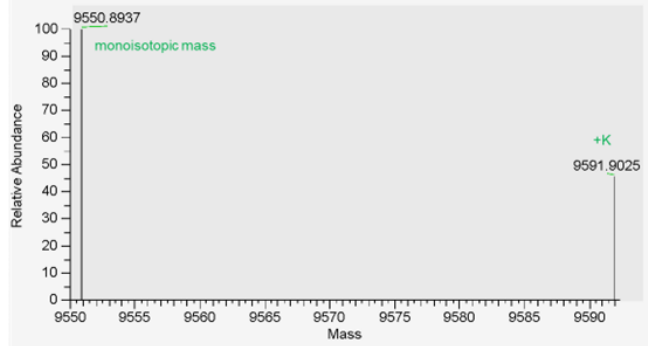

p

Voyager Spec #1=>NR(2.00)=>BC=>SM5[BP = 9910.7, 2606]

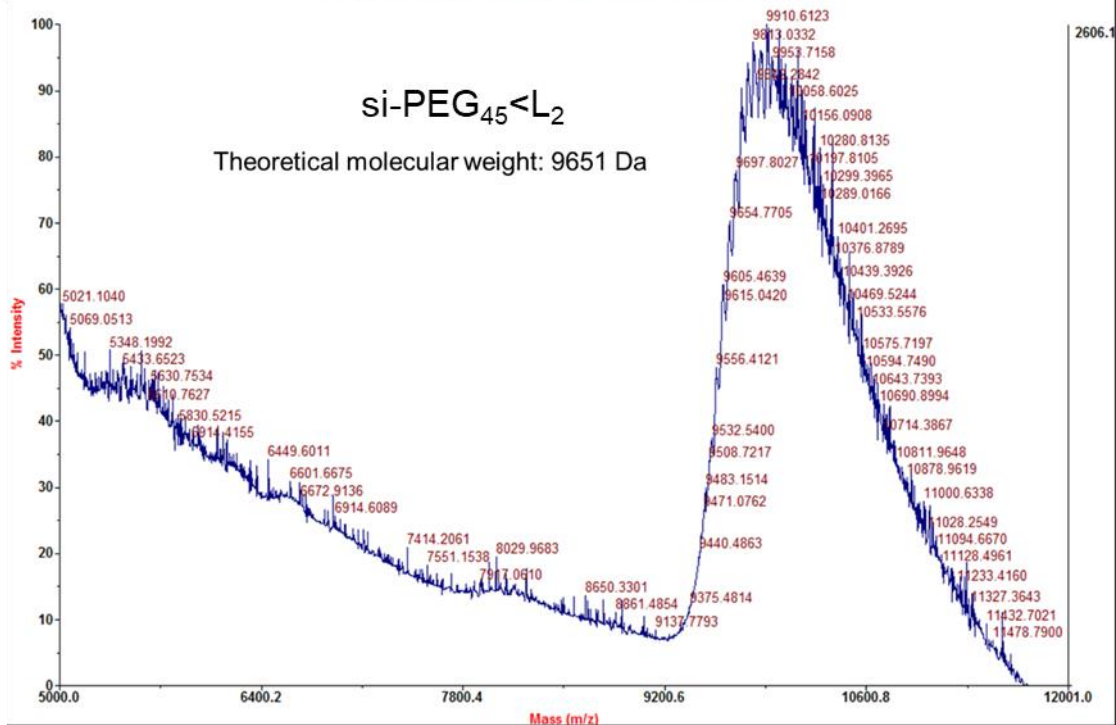

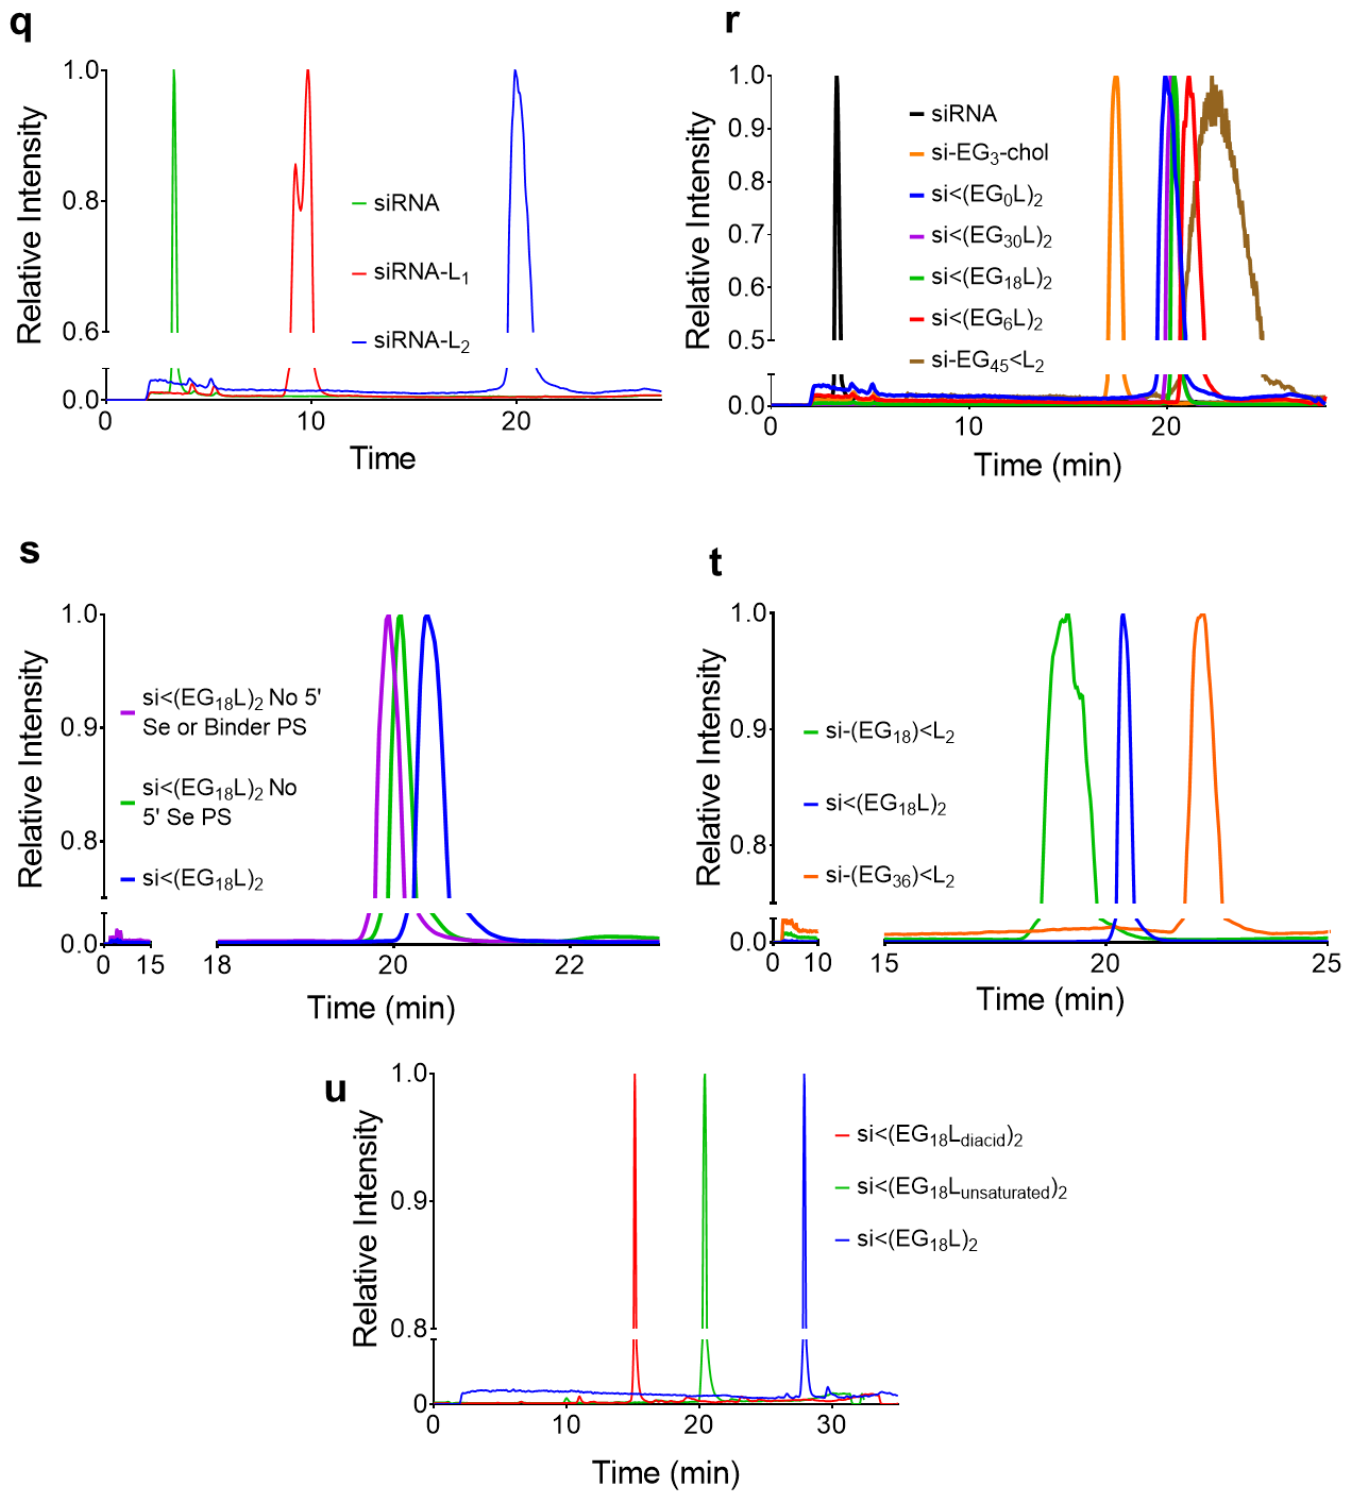

**Supplementary Figure 1: LC-MS and HPLC characterization of siRNA and siRNA conjugates.** Conjugate purity and mass fidelity were confirmed by LCMS ESI<sup>-</sup>. LC was performed using a Waters XBridge Oligonucleotide BEH C18 Column under a linear gradient from 85% A (16.3 mM triethylamine – 400 mM hexafluoroisopropanol) to 100% B (methanol) at 45°. (A-P) Full spectrum presented on left and deconvoluted mass presented on right as calculated by ThermoFisher FreeStyle Software. Molecular weight of si<PEG<sub>45</sub>L<sub>2</sub> was validated using MALDI-TOF mass spectrometry. HPLC chromatograms for siRNAs with variations in valency (Q), number of ethylene glycol linker repeats (R), phosphorothioate content (S), branching architecture (T), and lipid chemistry (U). Axes are adjusted to enable visualization of differences in elution time.

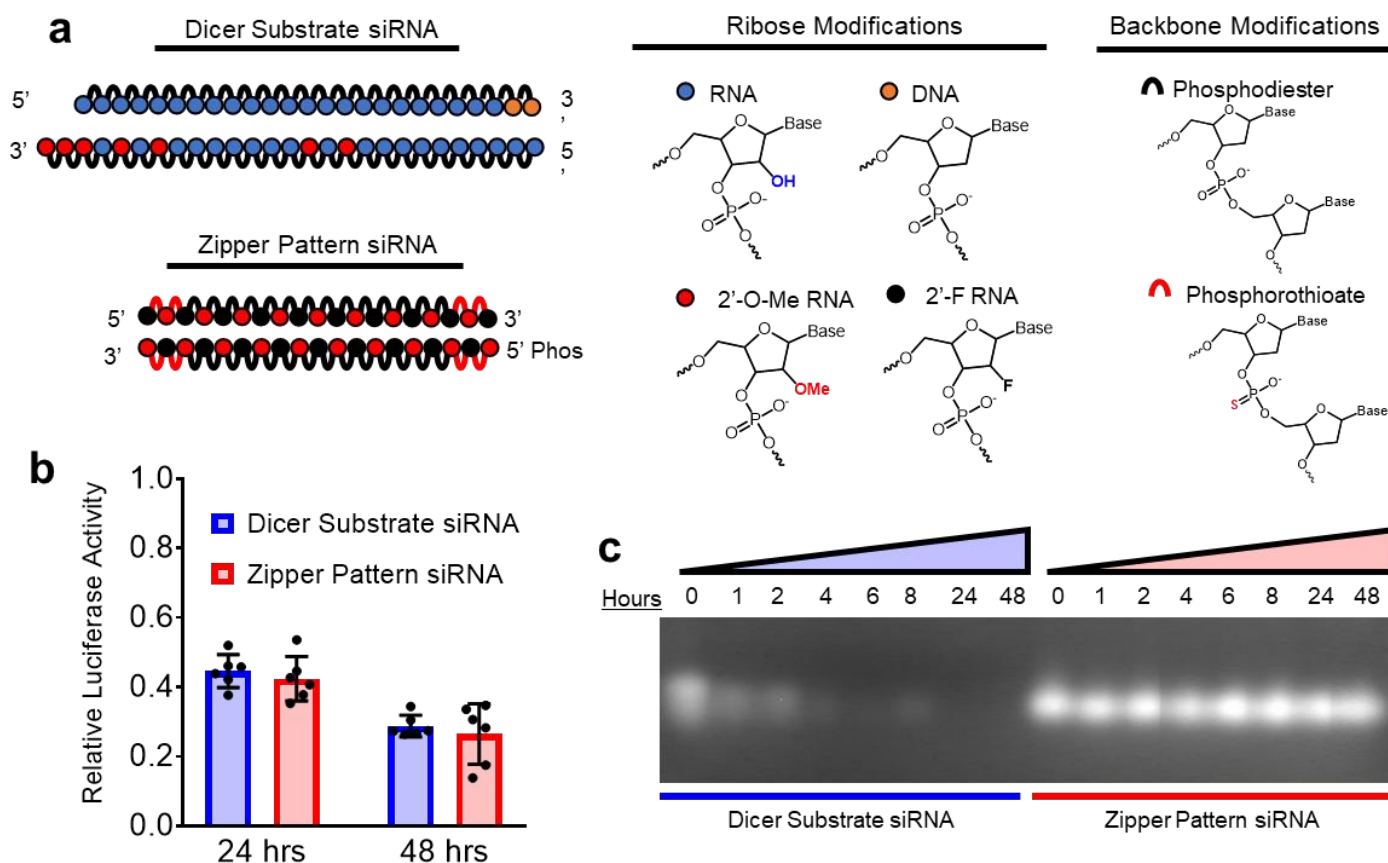

**Supplementary Figure 2: siRNA modification pattern validation and stability.** (A) Graphical schematic of structural differences between synthetic Dicer Substrate siRNA and alternating 2'-F-, 2'-OMe-modified "Zipper" siRNA used throughout this study. (B) Lipofection-mediated knockdown of 25 nM siRNA in Luciferase-expressing MDA-MB-231s. Luminescent signal was normalized to negative control siRNAs to account for any nonspecific toxicity effects (n=6). (C) Serum stability of siRNA challenged with 60% fetal bovine serum at 37°C visualized by agarose gel electrophoresis.

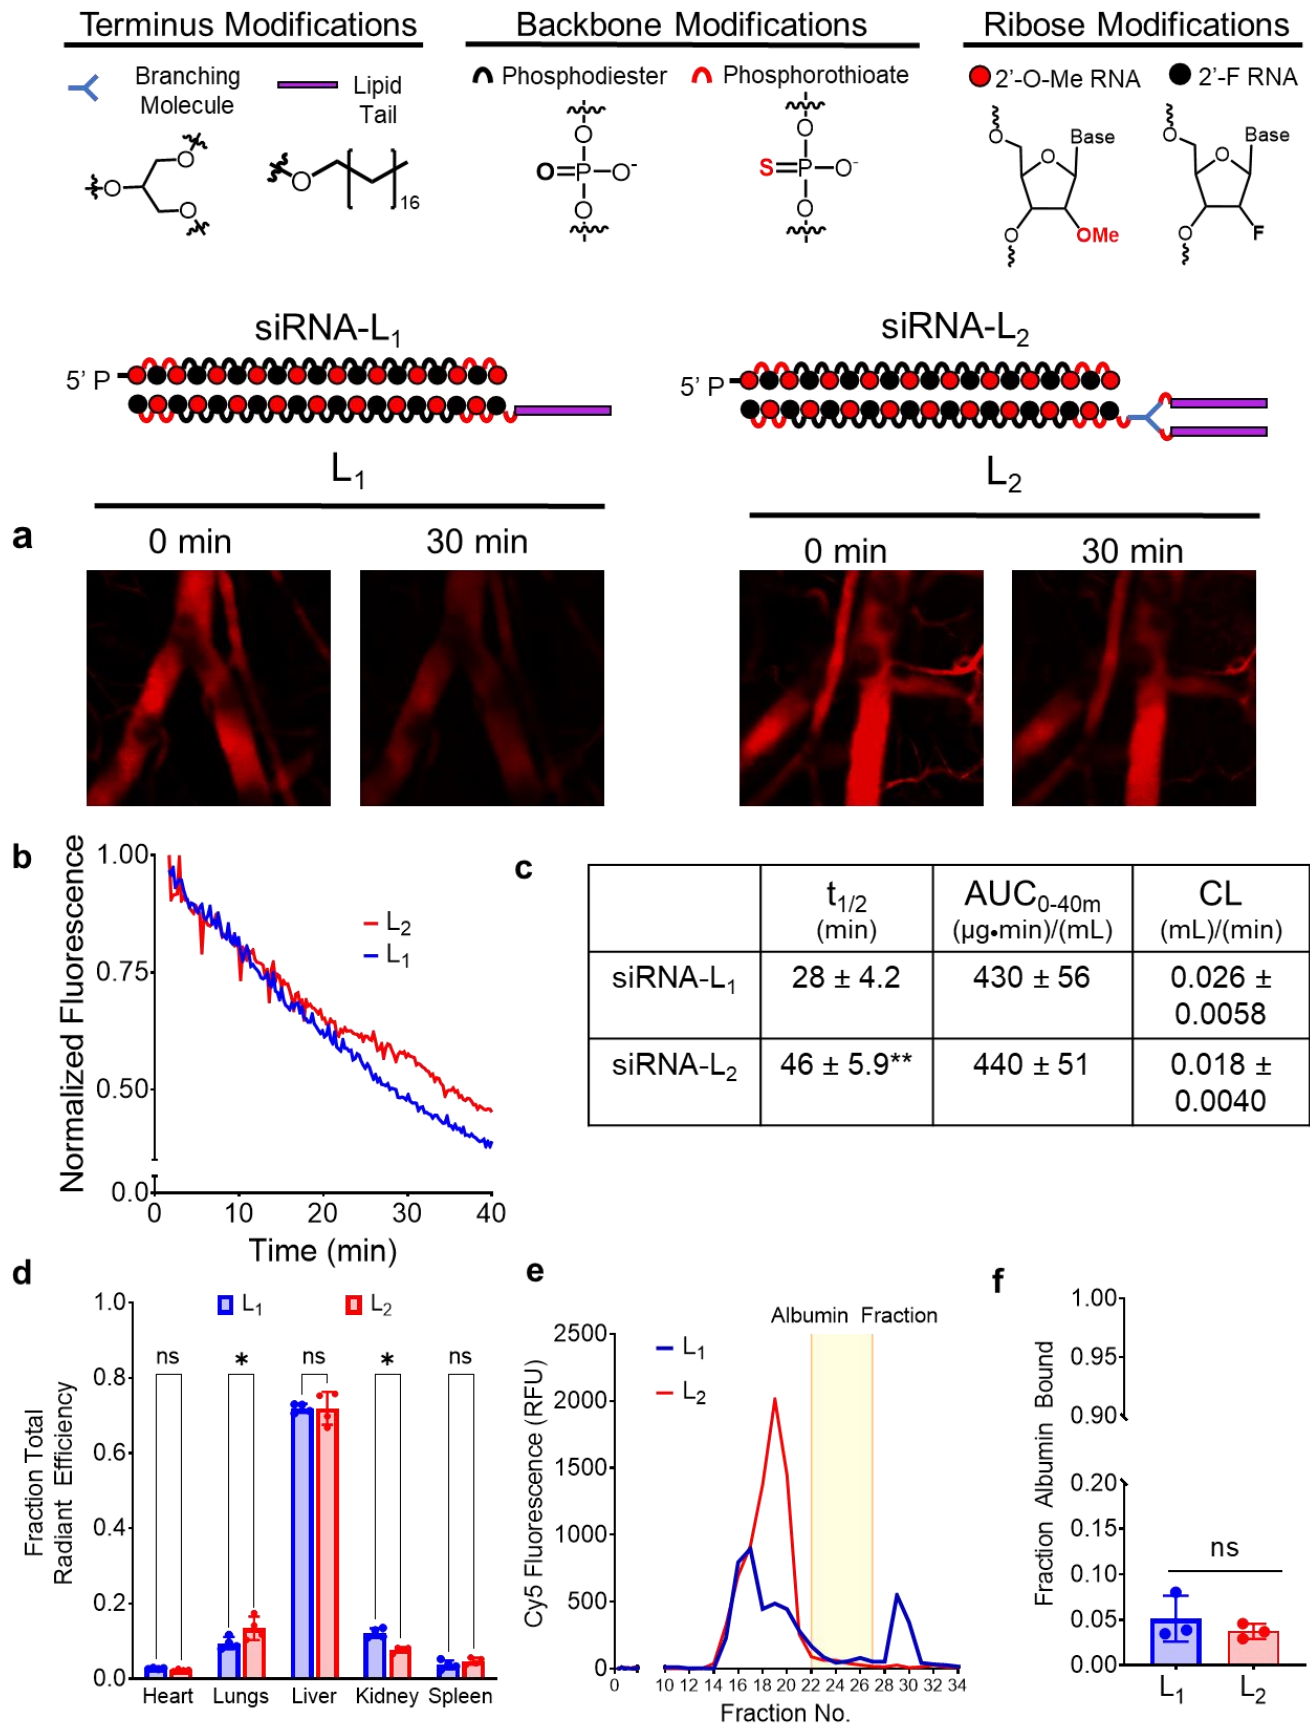

**Supplementary Figure 3:** Divalent lipid-siRNA conjugate exhibits improved bioavailability compared to monovalent conjugate A) Representative intravital microscopy images of mouse ear vasculature monitored for fluorescence decay after i.v. injection of siRNA conjugate. B) Average of (n=4) intravital fluorescent signals from individual mice displayed. C) Pharmacokinetic parameters of siRNA conjugates determined by intravital

microscopy (D) Biodistribution of fluorescent conjugates approximately 45 minutes after 1 mg/kg intravenous injection as measured by IVIS (n=4). Significance assessed by 2-way ANOVA with Sidak's multiple comparisons tests (E) Plasma samples collected from mice approximately 1h after treatment (1 mg/kg) were fractionated and quantitated for Cy5 fluorescence by size exclusion chromatography. A representative trace is shown of fluorescence signal within each plasma fraction for each siRNA structure; the albumin-containing plasma fractions are highlighted. F) Cy5 fluorescence within the albumin-containing fractions was quantitated relative to total plasma fluorescence fraction of conjugate bound to albumin in mouse plasma after 1 mg/kg intravenous injection as calculated from known standards and sum of fractions' fluorescent intensities (n=3). Significance assessed using Welch's t-test.

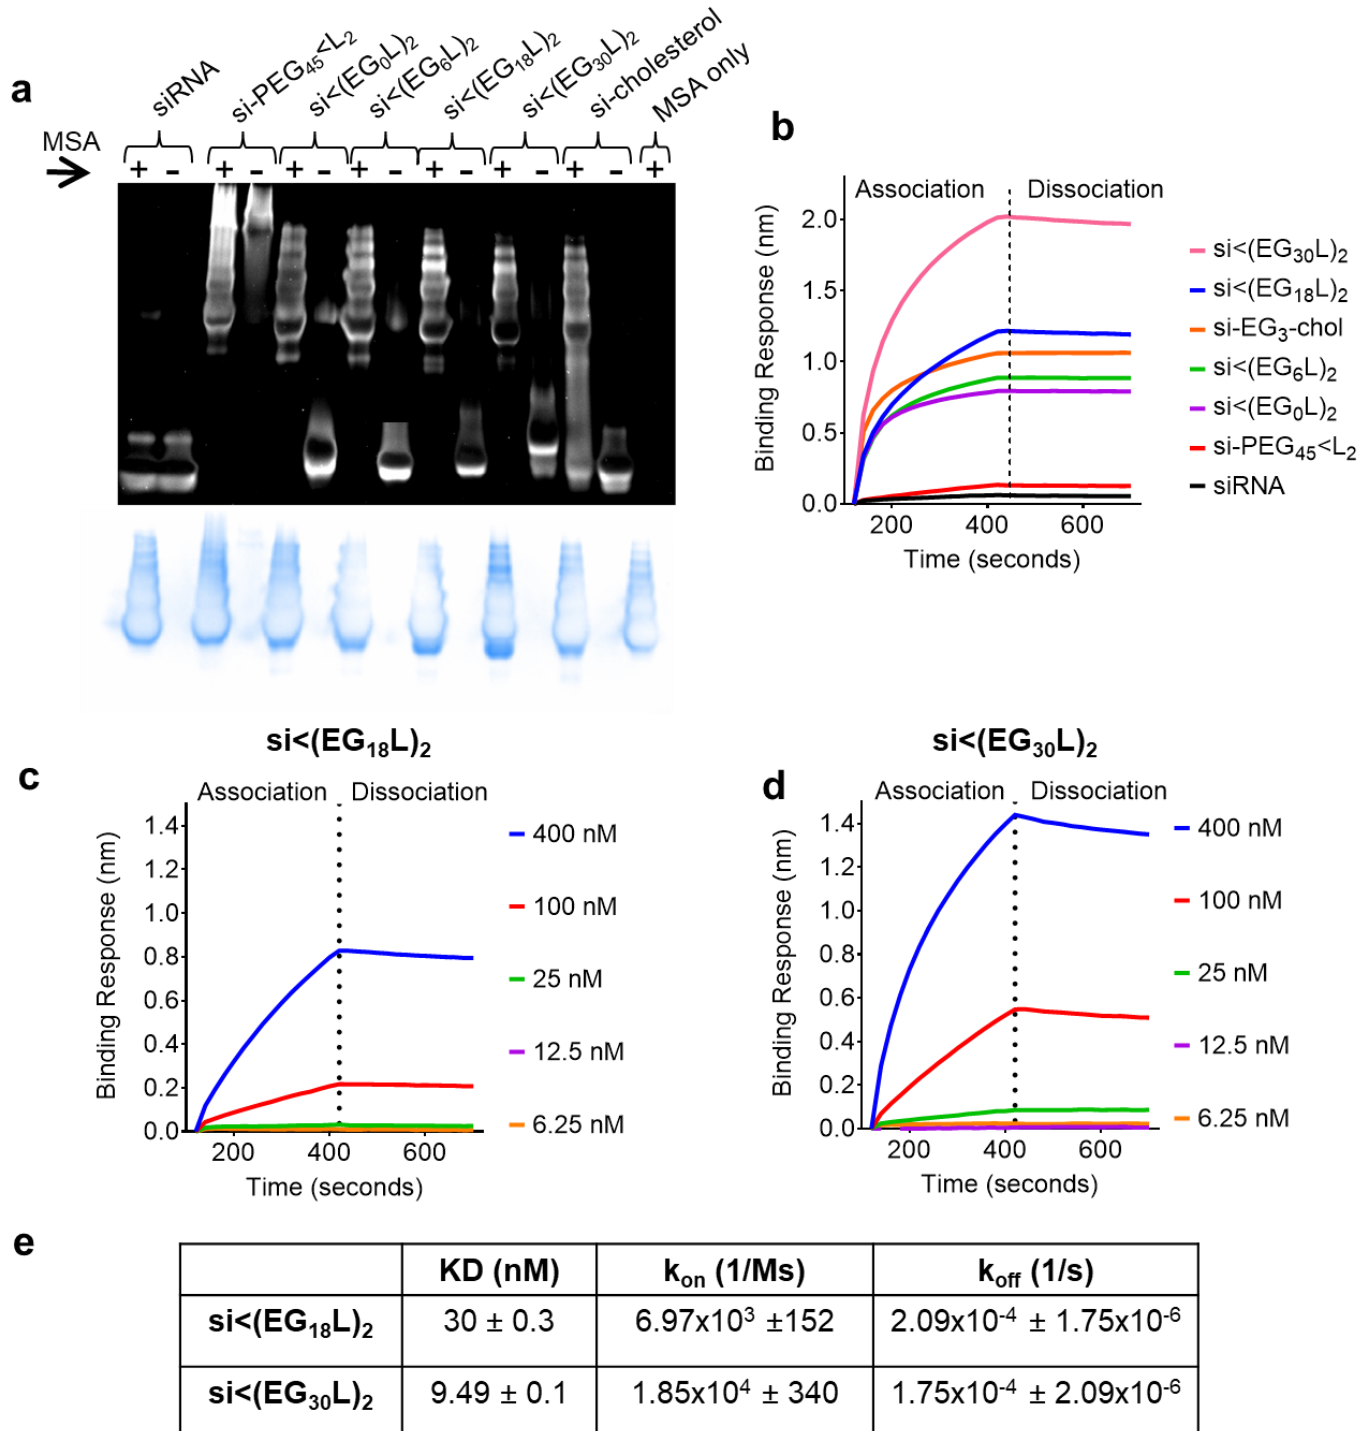

**Supplementary Figure 4:** (A) Native PAGE Gel of siRNA conjugates run in the presence or absence of mouse serum albumin (MSA). Albumin colocalization can be seen by an upwards shift of nucleic acid staining

to coincide with albumin (indicated in bottom panel by staining of the same gel with Coomassie blue). (B) Binding response of siRNA conjugates to 400 nM mouse serum albumin as measured by biolayer interferometry. Full panel of (C) si<(EG<sub>18</sub>L)<sub>2</sub> and (D) si<(EG<sub>36</sub>L)<sub>2</sub> binding responses to HSA used to determine (E) binding kinetic parameters.

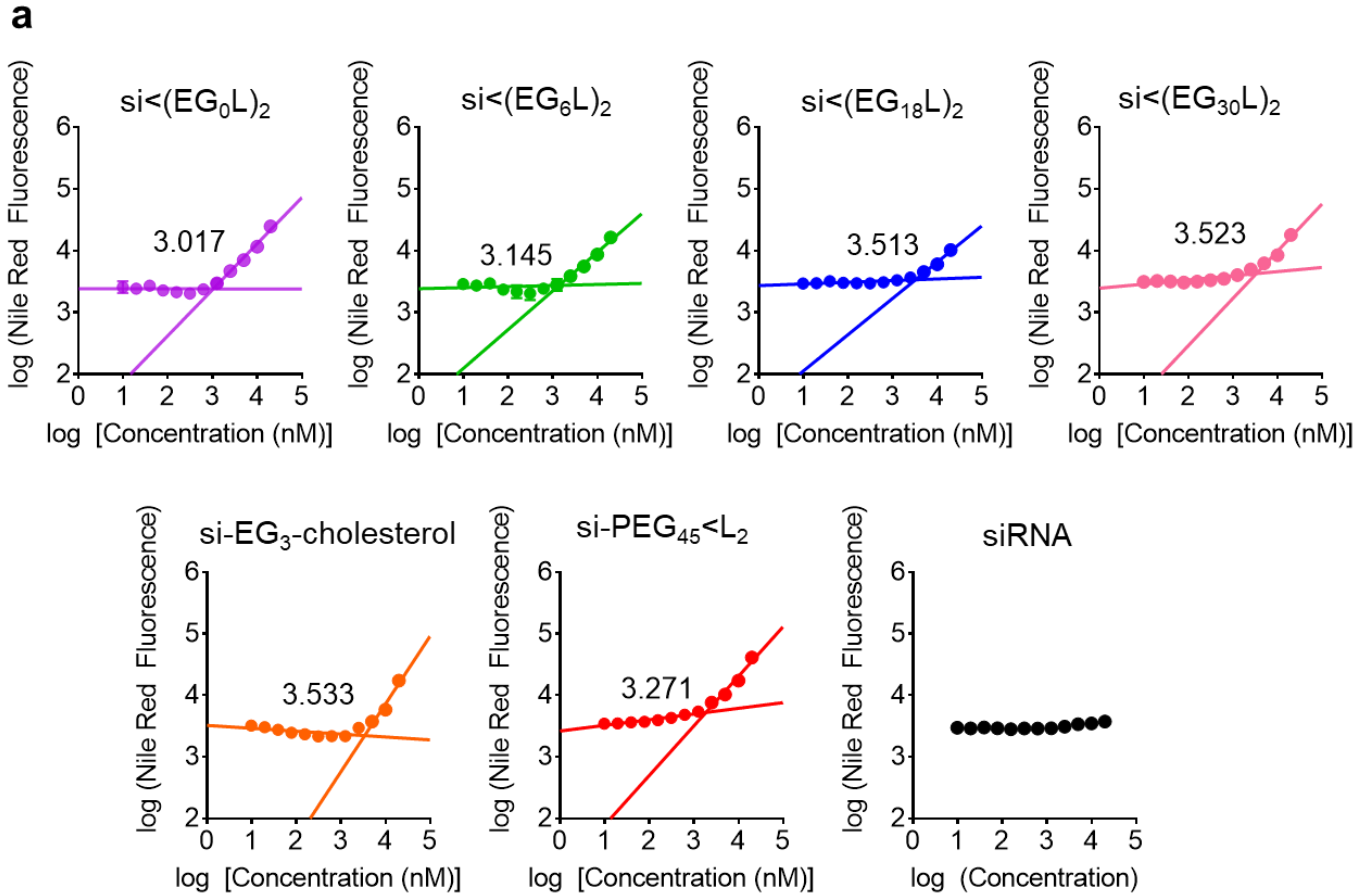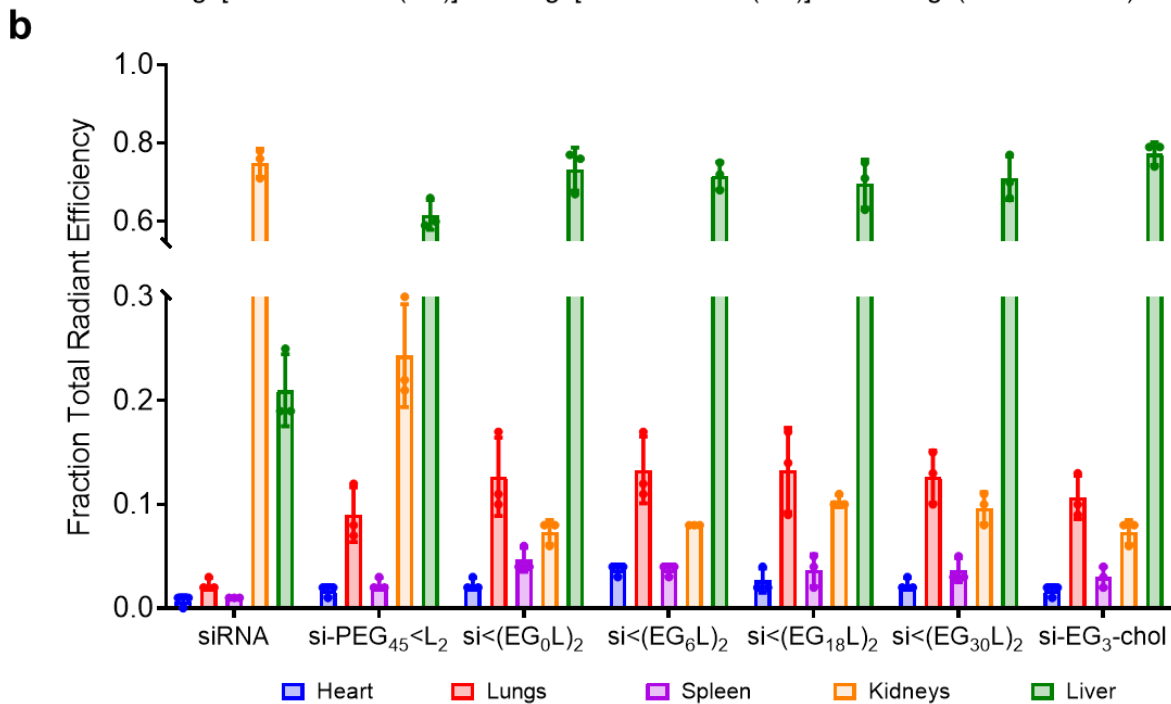

**Supplementary Figure 5:** (A) Critical micelle concentration (CMC) plots for siRNA conjugate library. (B) Biodistribution of Cy5-labeled siRNA conjugates in non-tumor bearing mice. Organs harvested approximately 1 h after injection at 1 mg/kg intravenously *via* tail vein (n=3).



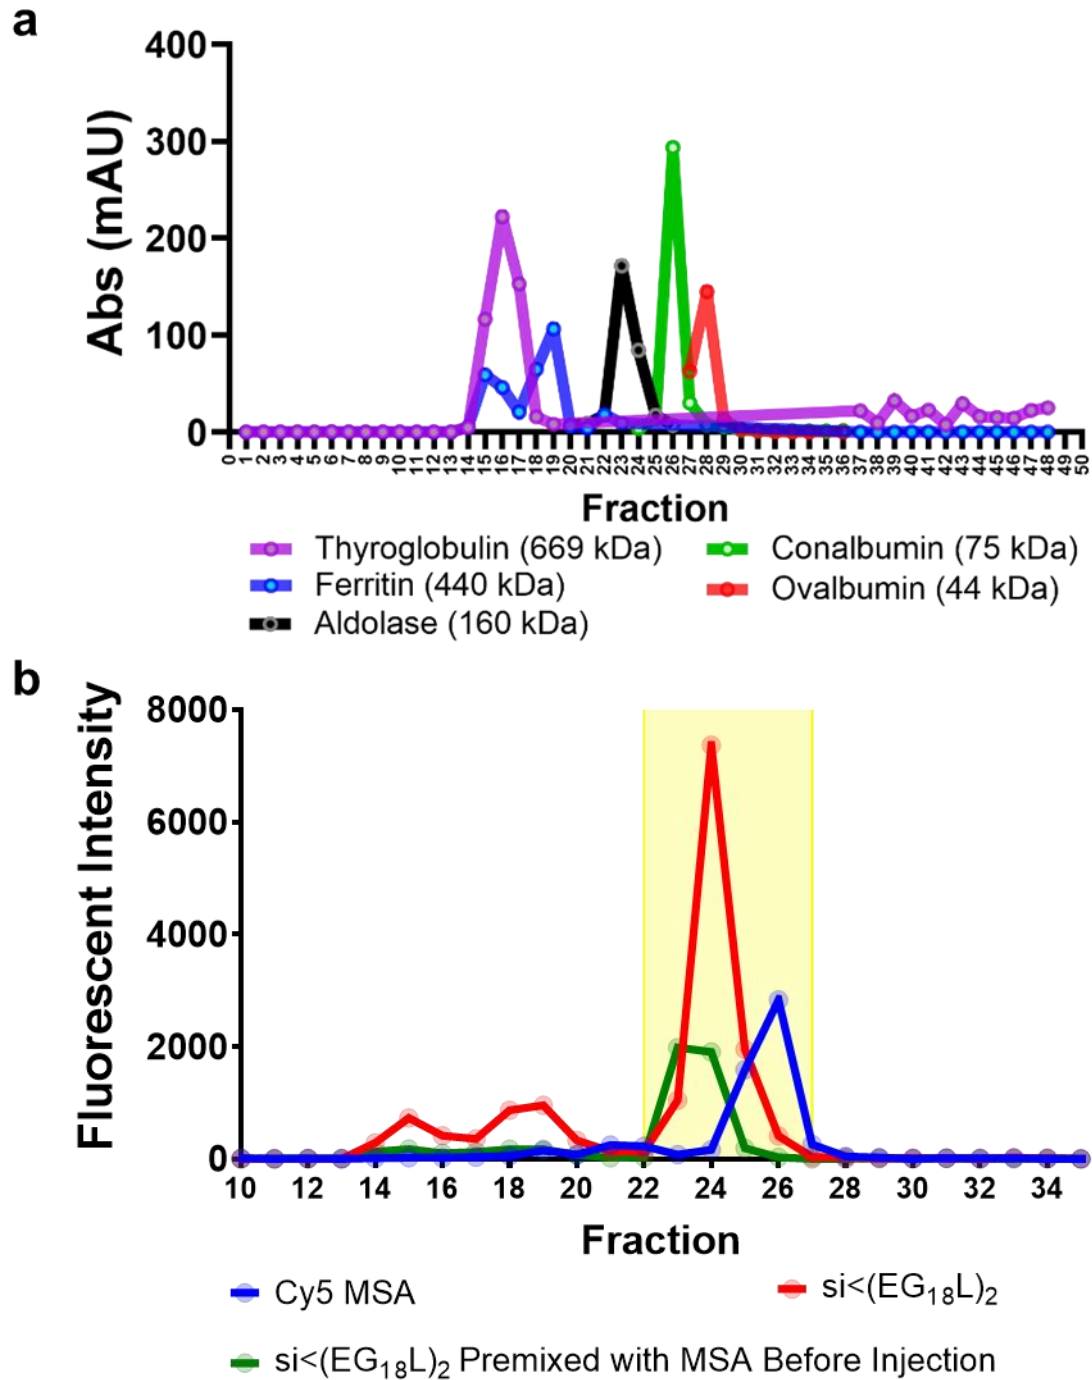

**Supplementary Figure 6:** (A) Size exclusion chromatography (SEC) of protein standards. Representative protein standards run on SEC system to demonstrate resolution by molecular weight. (B) Size exclusion chromatography (SEC) of mouse plasma after injection with Cy5-siRNA conjugate +/- native MSA versus Cy5-MSA alone. Mice were injected at 1 mg/kg intravenously via tail vein and plasma was harvested approximately 1h after injection. Fractions highlighted in yellow were used for calculating albumin-bound fraction.

# DAPI AlexaFluor488

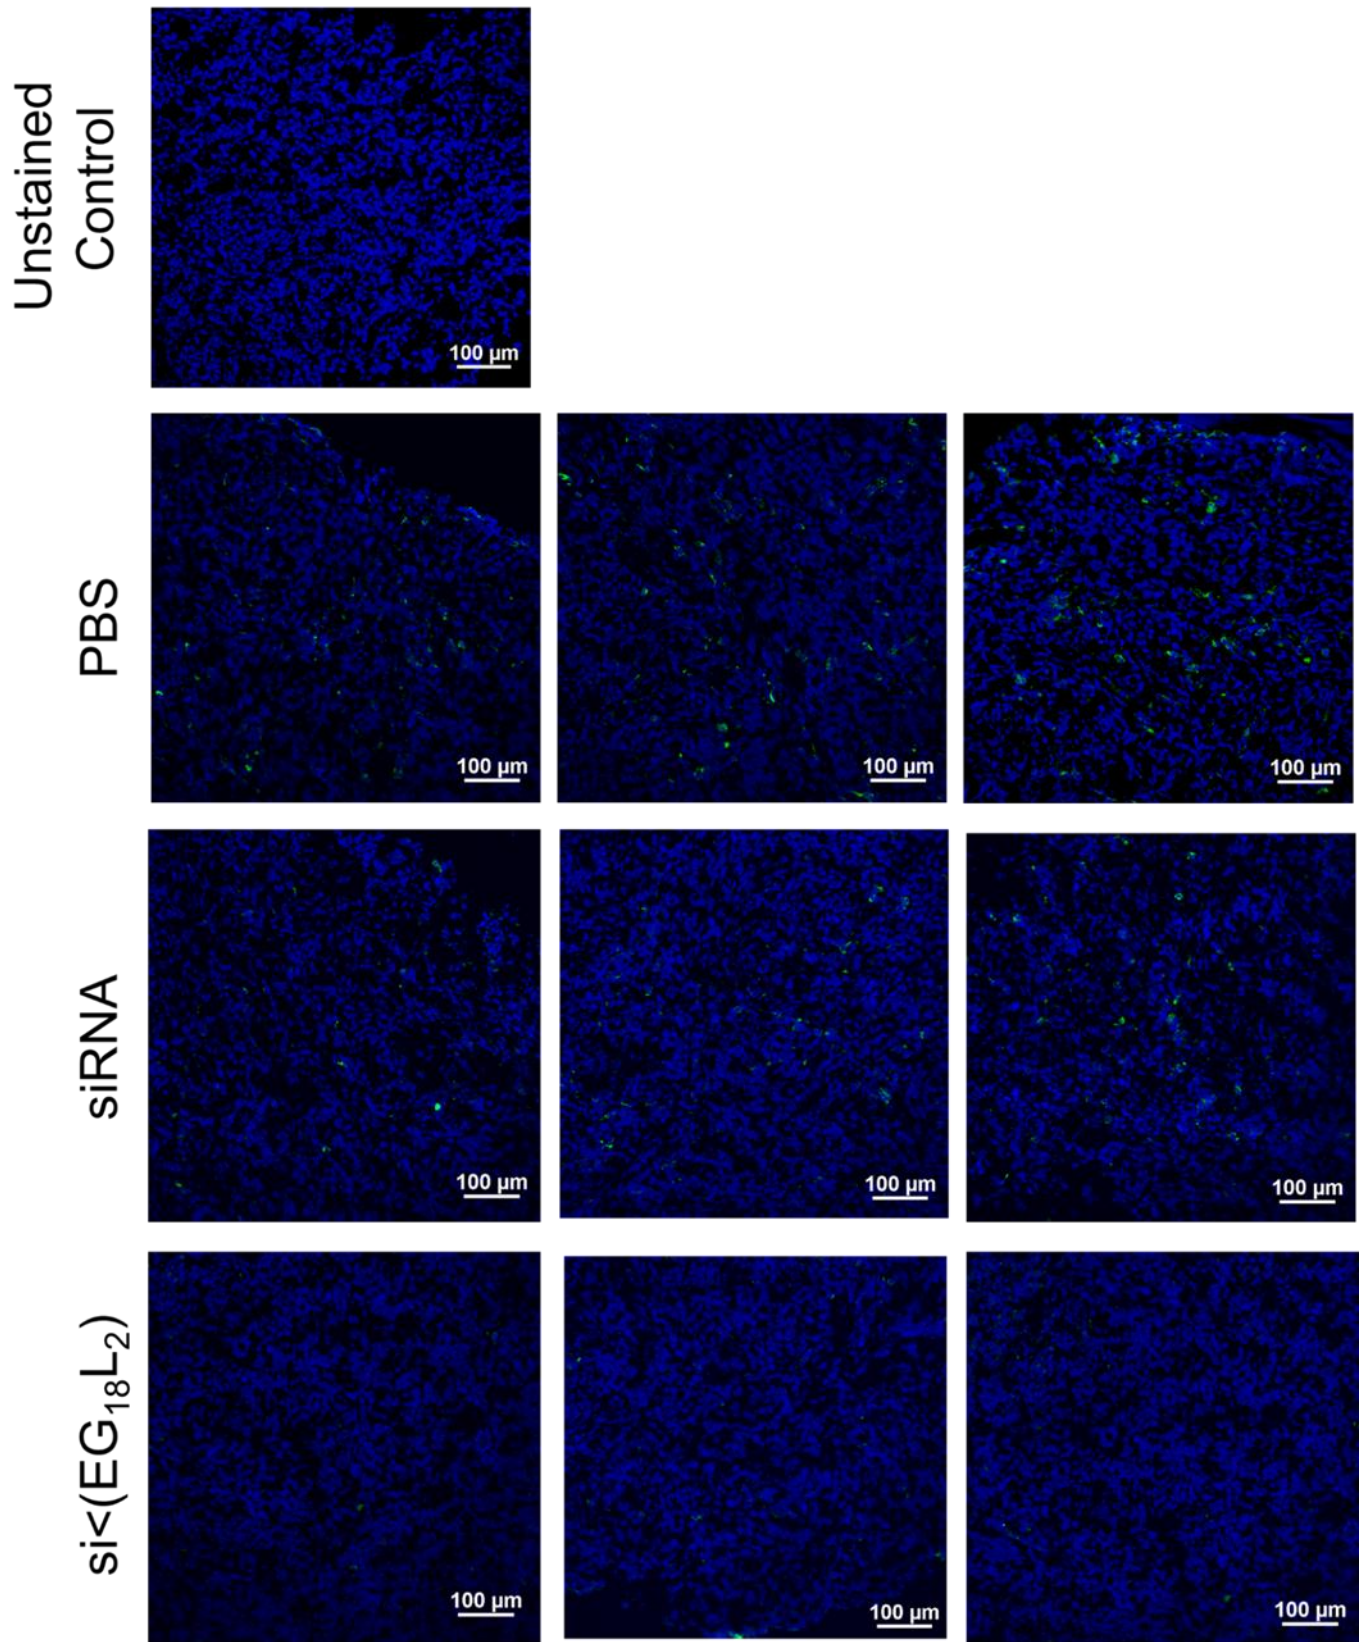

**Supplementary Figure 7:** Extended images of tumors sectioned and immunohistochemically stained for Firefly Luciferase protein (green, Alexafluor488) and cell nuclei (blue, DAPI).

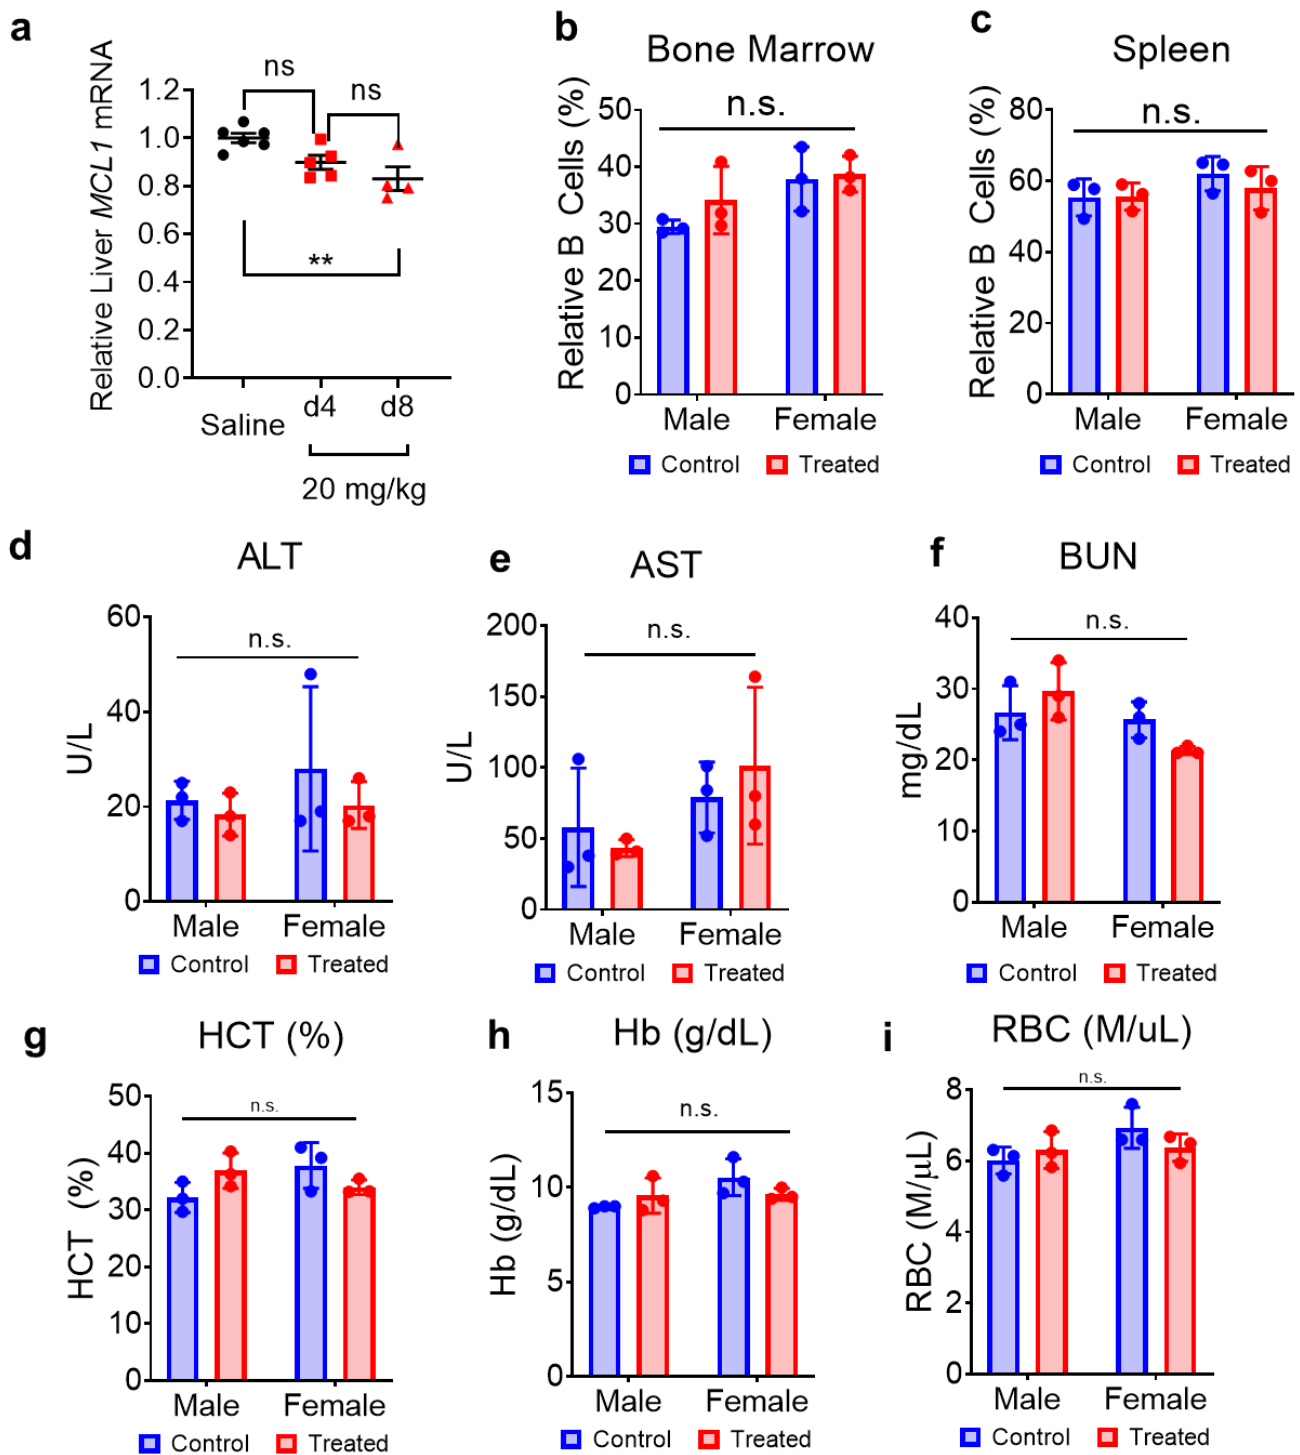

**Supplementary Figure 8:** (A) Liver knockdown of Mcl-1 mRNA after bolus i.v. injection of si<sub>Mcl-1</sub>-(EG<sub>18L</sub>)<sub>2</sub>. Significance assessed by 1-way ANOVA with Tukey's multiple comparisons test (n=4-6). B cells relative to total viable cells isolated from (B) bone marrow and (C) spleen isolated from wild type mice three days after injection with 20 mg/kg siRNA conjugate targeting Mcl-1 compared to untreated controls. Levels of blood chemistry markers of toxicity including (D) alanine aminotransferase, (E) aspartate aminotransferase, and (F) blood urea nitrogen were measured on sera of treated and untreated mice. Significance assessed by 2-way ANOVA with Tukey's multiple comparisons test (n=3). (G-I) Complete blood count values collected from mice 3 days after injection with 20 mg/kg of siRNA conjugate targeting Mcl-1. Significance assessed by 2-way ANOVA (n=3).

**a**

## BD FACSDiva 8.0.1

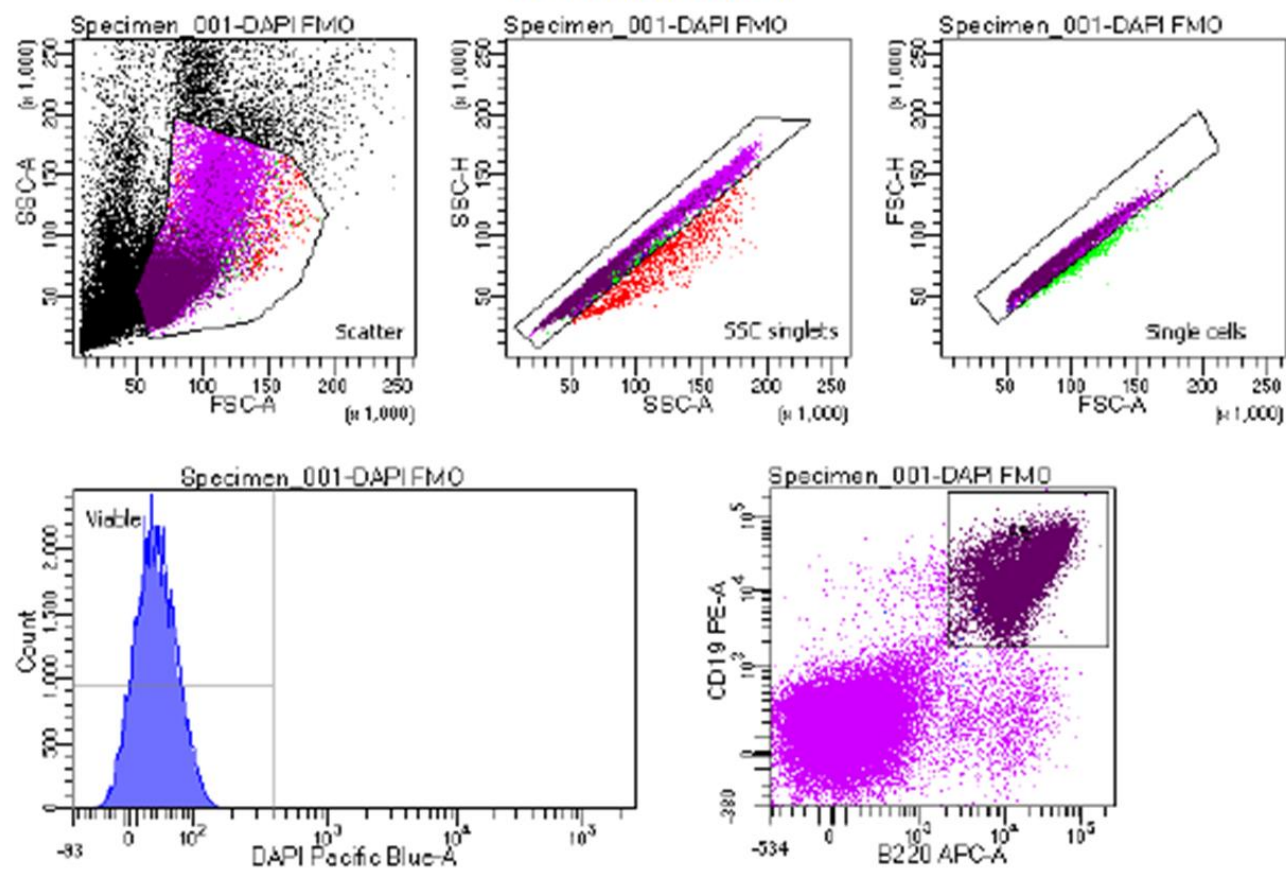

| Tube: DAPI FMO |         |         |        |
|----------------|---------|---------|--------|
| Population     | #Events | %Parent | %Total |
| All Events     | 81.448  | ####    | 100.0  |
| Scatter        | 52.307  | 64.2    | 64.2   |
| SSC singlets   | 51.112  | 97.7    | 62.8   |
| Single cells   | 50.376  | 98.6    | 61.9   |
| Viable         | 50.302  | 99.9    | 61.8   |
| P5             | 23.910  | 47.5    | 29.4   |

b

## BD FACSDiva 8.0.1

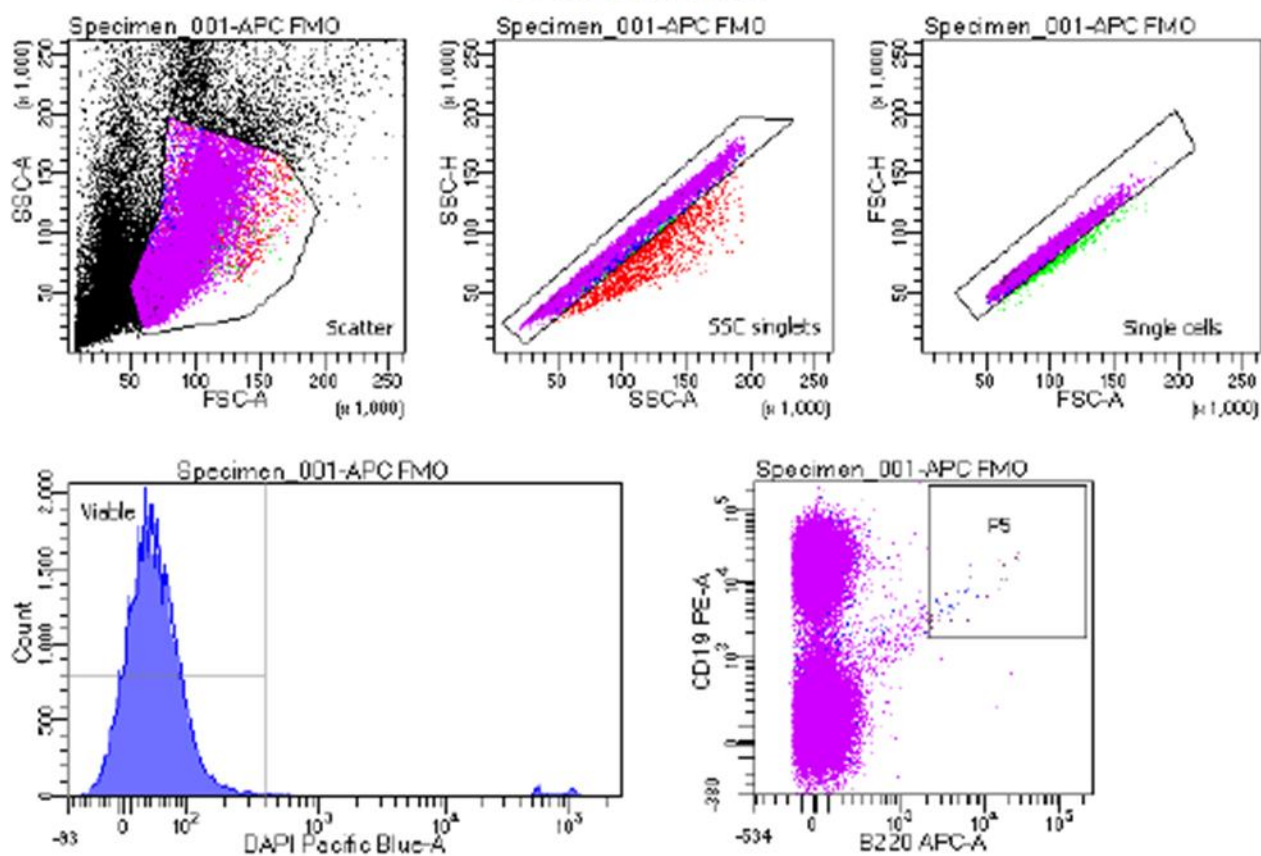

| Tube: APC FMO |         |         |        |
|---------------|---------|---------|--------|
| Population    | #Events | %Parent | %Total |
| All Events    | 91.421  | ###     | 100.0  |
| Scatter       | 54.222  | 59.3    | 59.3   |
| SSC singlets  | 52.697  | 97.2    | 57.6   |
| Single cells  | 52.084  | 98.8    | 57.0   |
| Viable        | 50.115  | 96.2    | 54.8   |
| P5            | 26      | 0.1     | 0.0    |

C

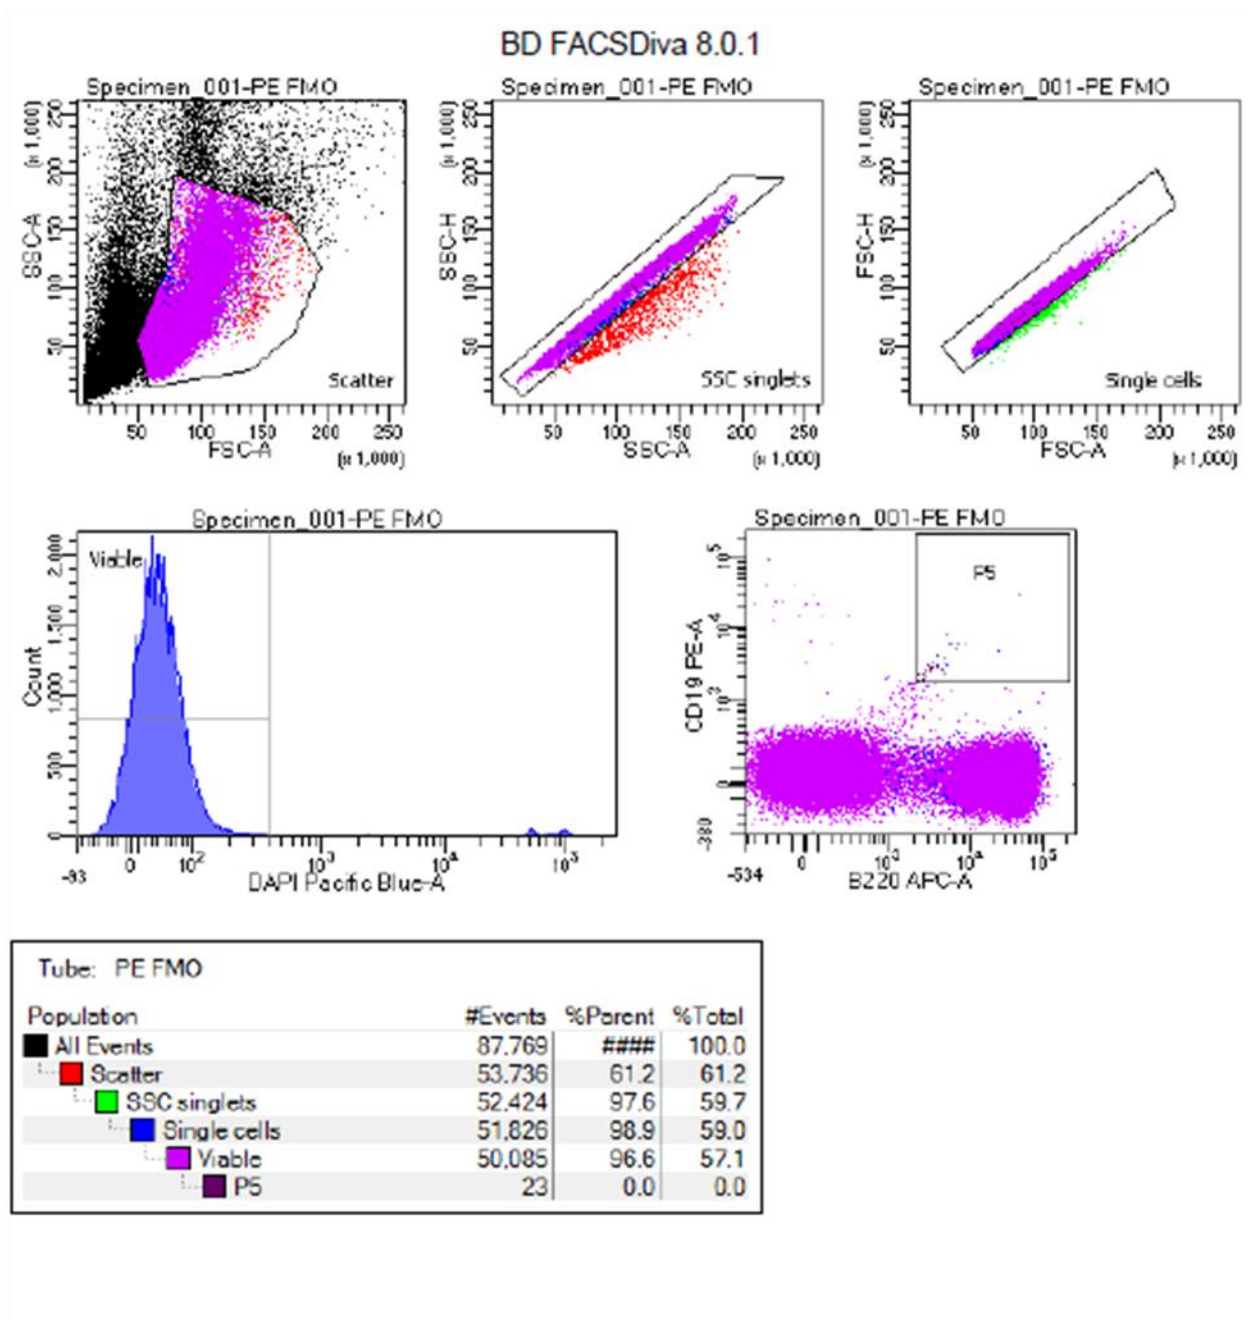

d

## BD FACSDiva 8.0.1

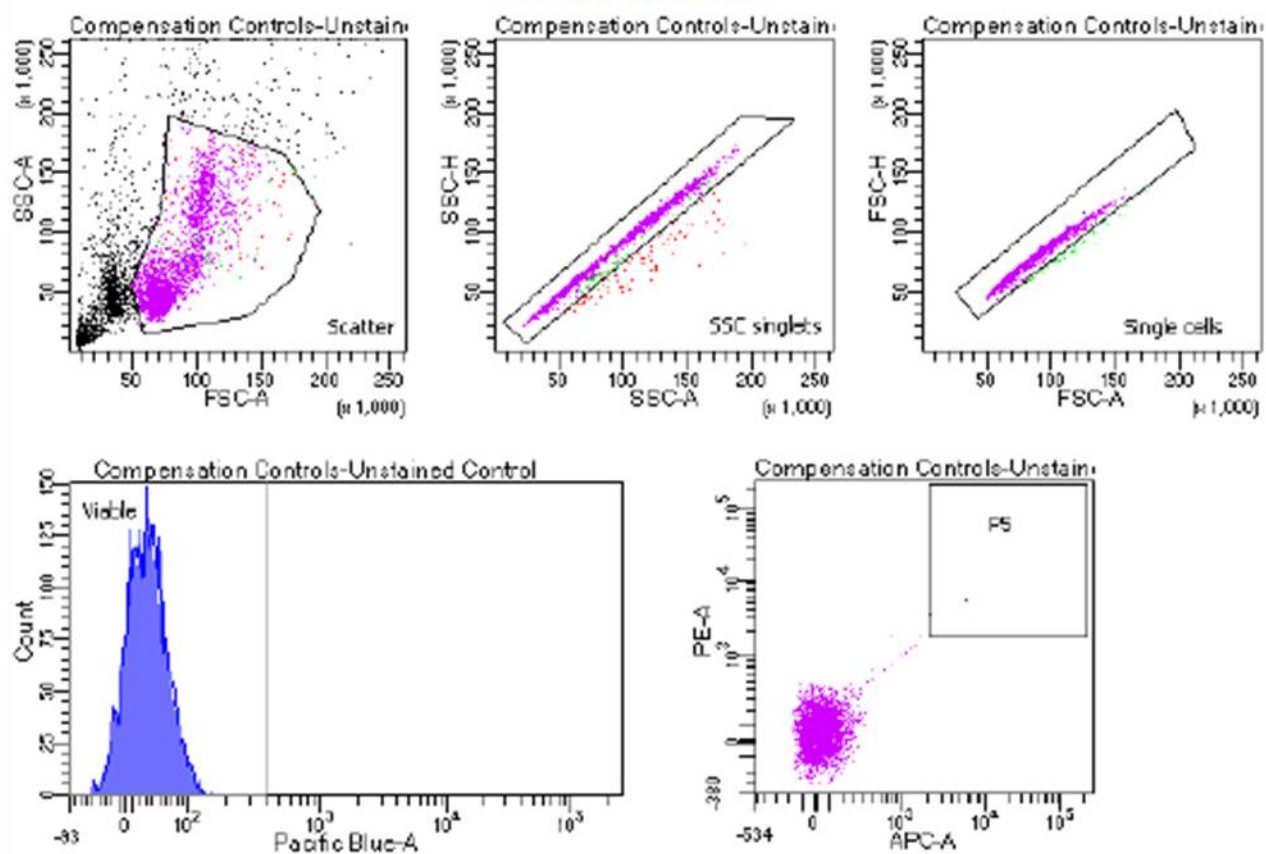

Tube: Unstained Control

| Population   | #Events | %Parent | %Total |
|--------------|---------|---------|--------|
| All Events   | 5.000   | ###     | 100.0  |
| Scatter      | 3.128   | 62.6    | 62.6   |
| SSC singlets | 3.042   | 97.3    | 60.8   |
| Single cells | 2,992   | 98.4    | 59.8   |
| Viable       | 2,991   | 100.0   | 59.8   |
| P5           | 1       | 0.0     | 0.0    |

e

## BD FACSDiva 8.0.1

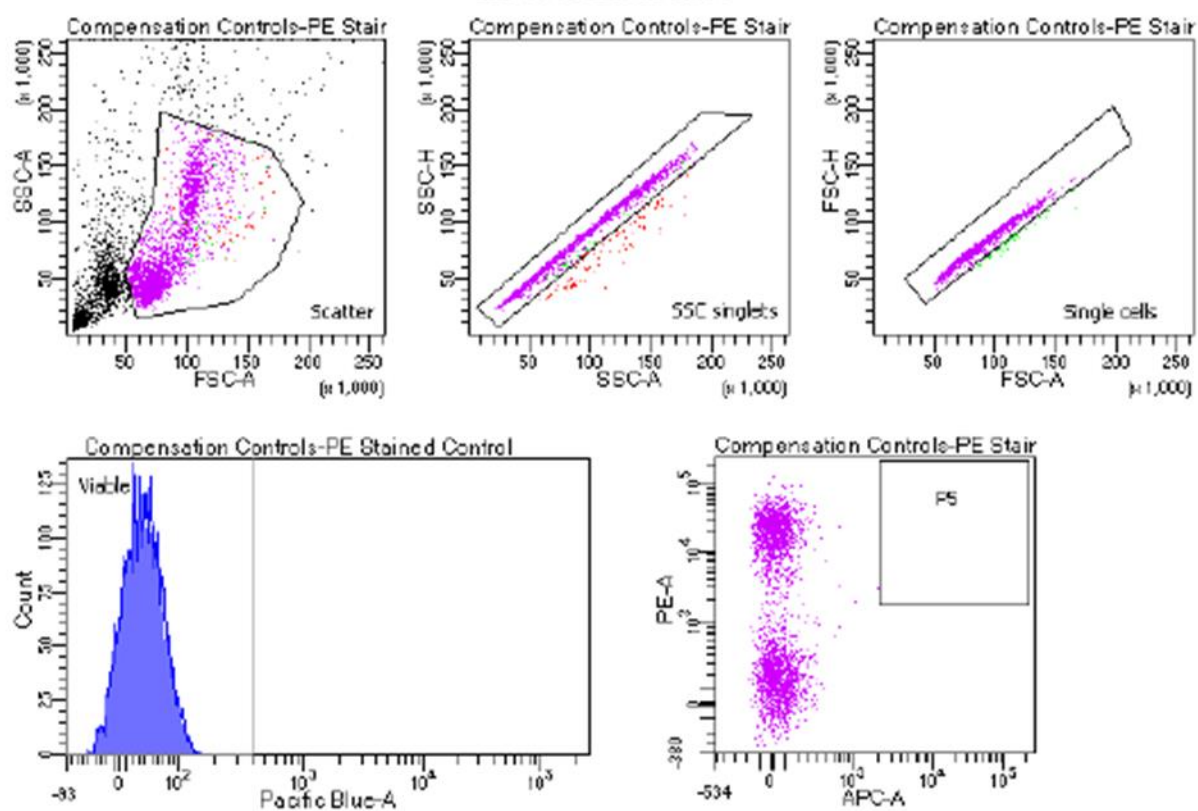

Tube: PE Stained Control

| Population   | #Events | %Parent | %Total |
|--------------|---------|---------|--------|
| All Events   | 5.000   | ###     | 100.0  |
| Scatter      | 3.075   | 61.5    | 61.5   |
| SSC singlets | 2.974   | 96.7    | 59.5   |
| Single cells | 2.925   | 98.4    | 58.5   |
| Viable       | 2.925   | 100.0   | 58.5   |
| P5           | 0       | 0.0     | 0.0    |



f

## BD FACSDiva 8.0.1

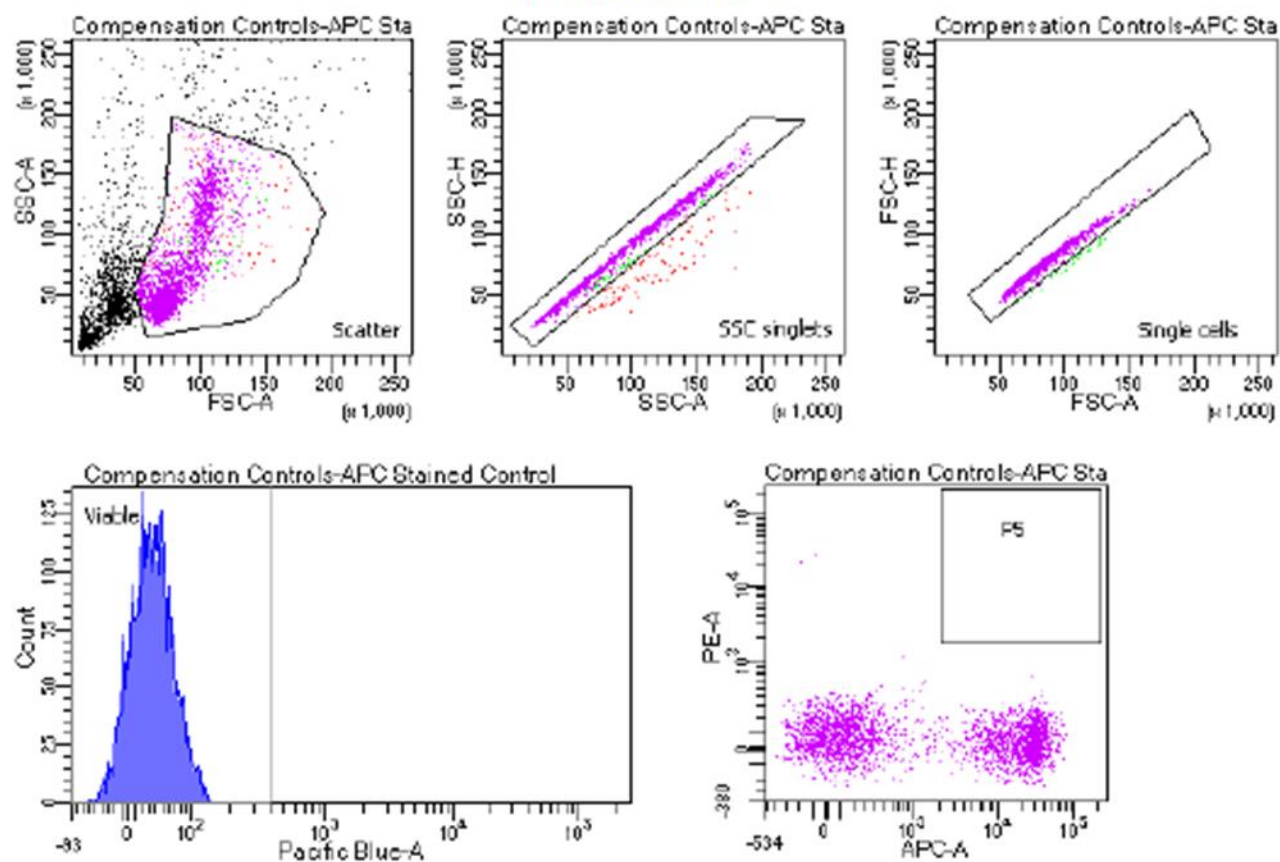

Tube: APC Stained Control

| Population   | #Events | %Parent | %Total |
|--------------|---------|---------|--------|
| All Events   | 5,000   | ###     | 100.0  |
| Scatter      | 3,005   | 60.1    | 60.1   |
| SSC singlets | 2,907   | 96.7    | 58.1   |
| Single cells | 2,862   | 98.5    | 57.2   |
| Viable       | 2,862   | 100.0   | 57.2   |
| PS           | 0       | 0.0     | 0.0    |

**g**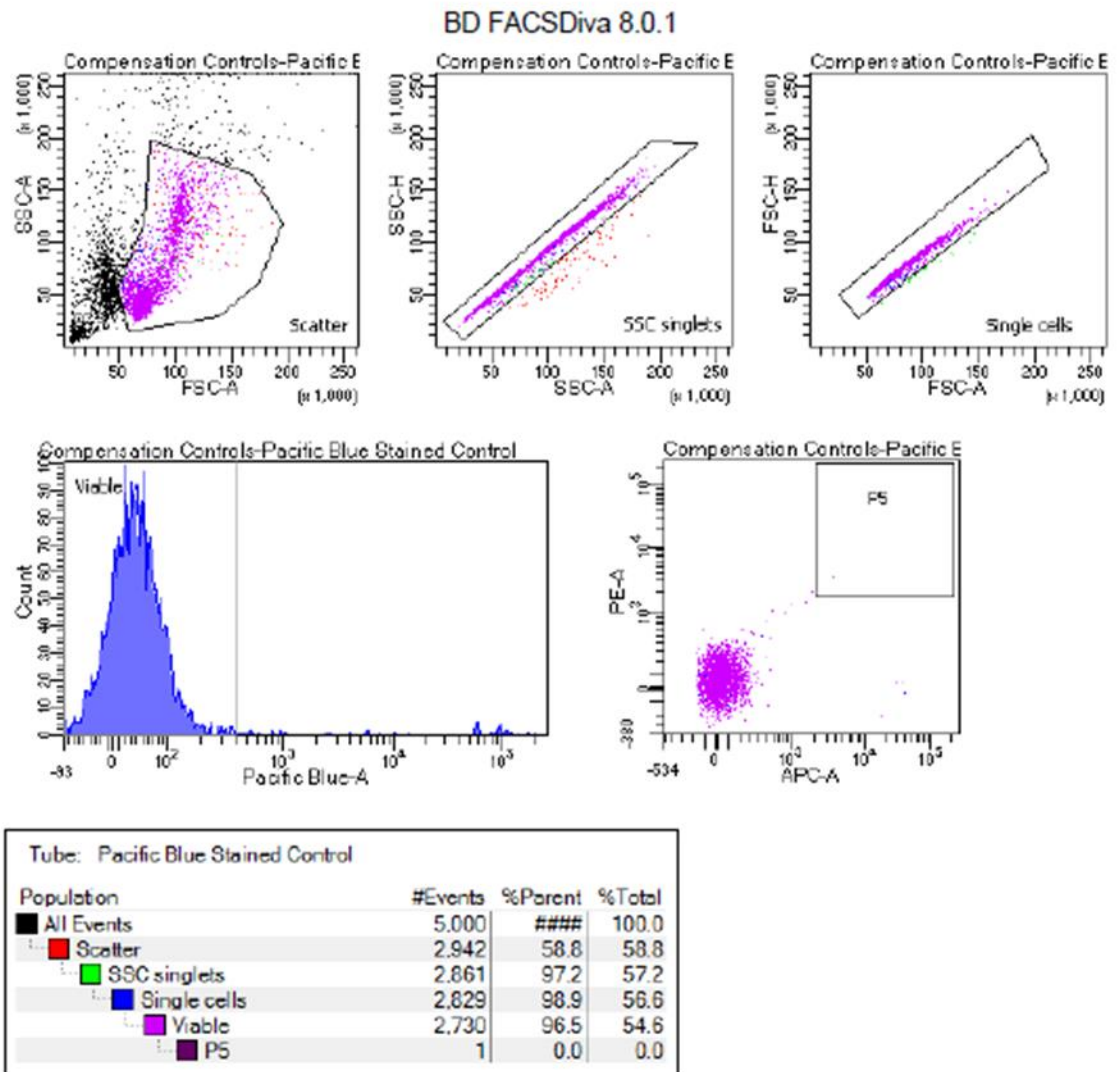

**Supplementary Figure 9: Flow gating for B cells harvested from mouse spleens and livers.**

Fluorescence Minus One (FMO) controls using pooled cells from all samples for (A) DAPI, (B) APC, and (C) PE antibodies to set boundaries for background signal. (D) Unstained pooled cell control. (E-G) PE, APC, and DAPI alone stained pooled cell controls used to inform gating.

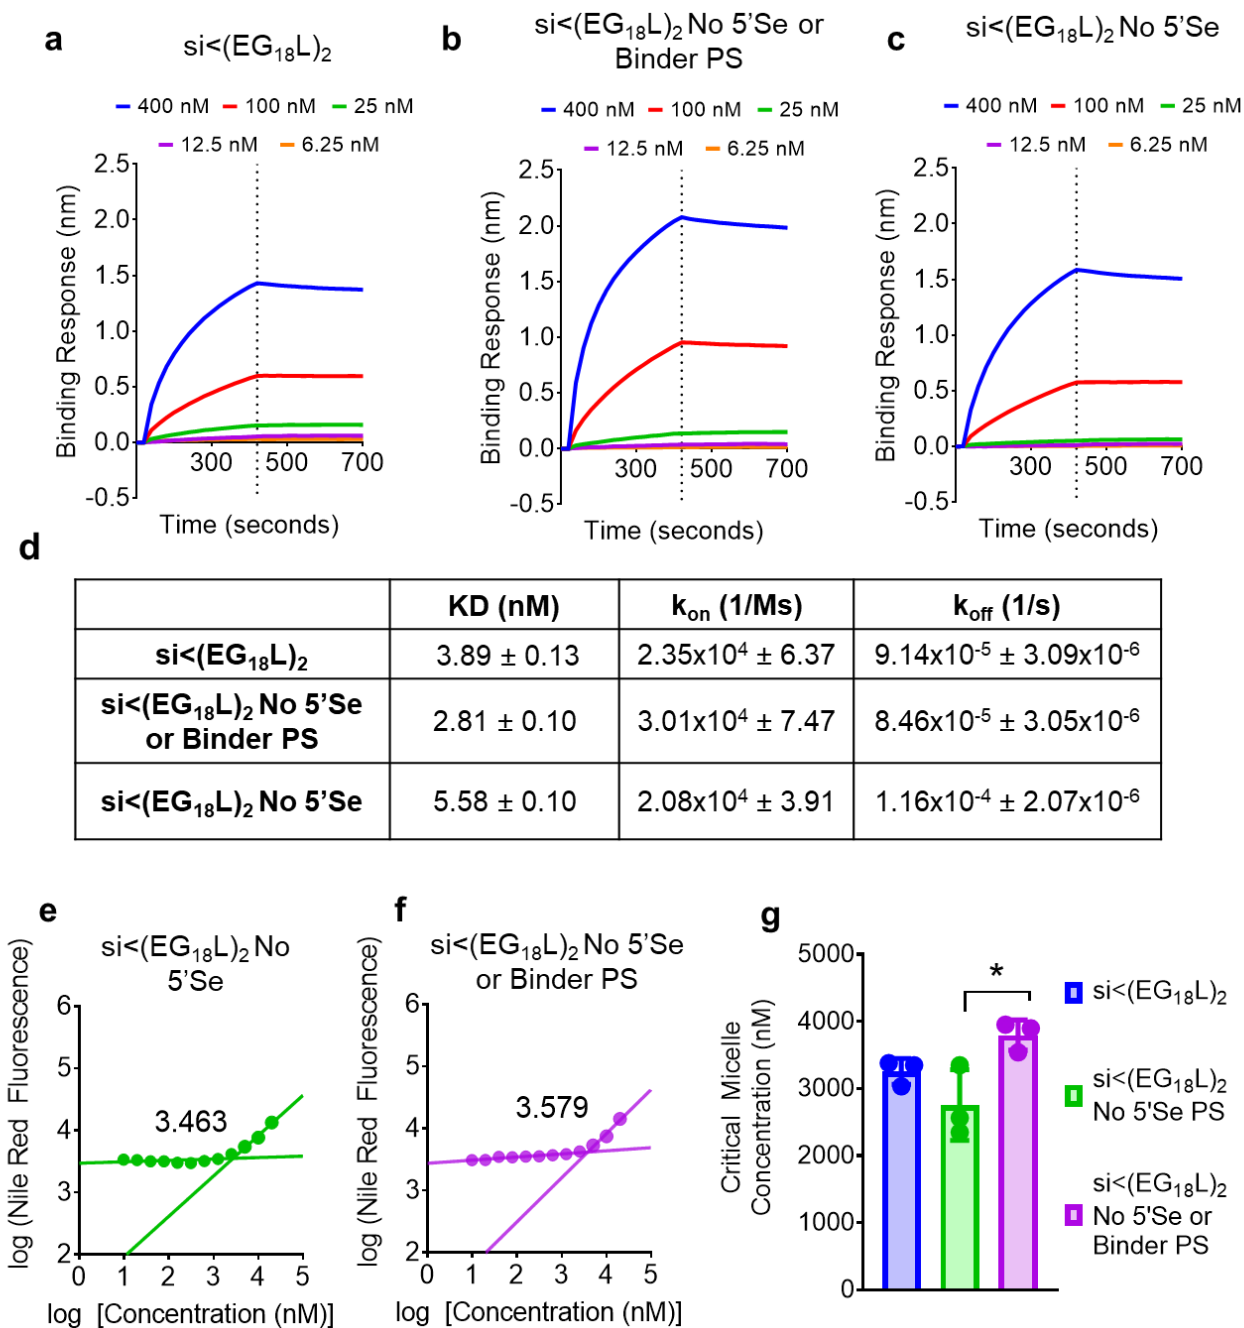

**Supplementary Figure 10: Extended characterization of  $si\langle(EG_{18}L)_2$  phosphorothioate variants.** (A-C) Full panel of binding responses to HSA at varied concentrations measured by biolayer interferometry used to determine (D) binding kinetic parameters. (E-G) Critical micelle concentration observed after 2-hour incubation with Nile Red at 37°C (n=3). Significance assessed by 1-way ANOVA with Tukey's multiple comparisons test.

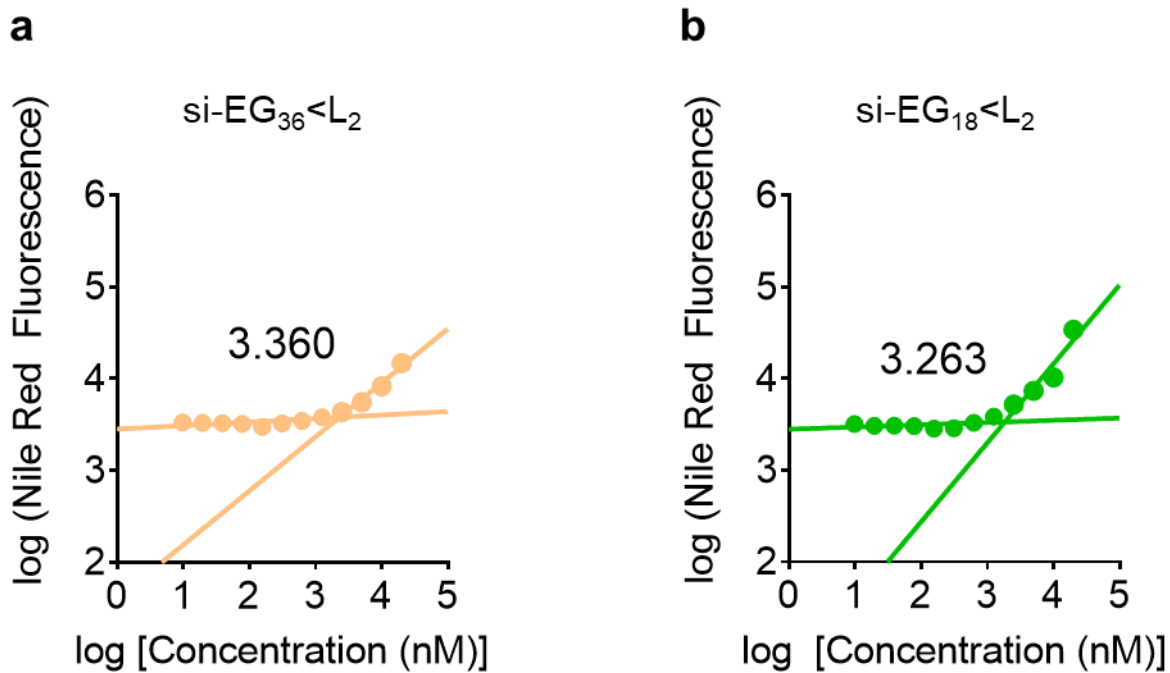

**Supplementary Figure 11:** Critical micelle concentration (CMC) plots for (A) si-EG<sub>36</sub><L<sub>2</sub> and (B) si-EG<sub>18</sub><L<sub>2</sub>

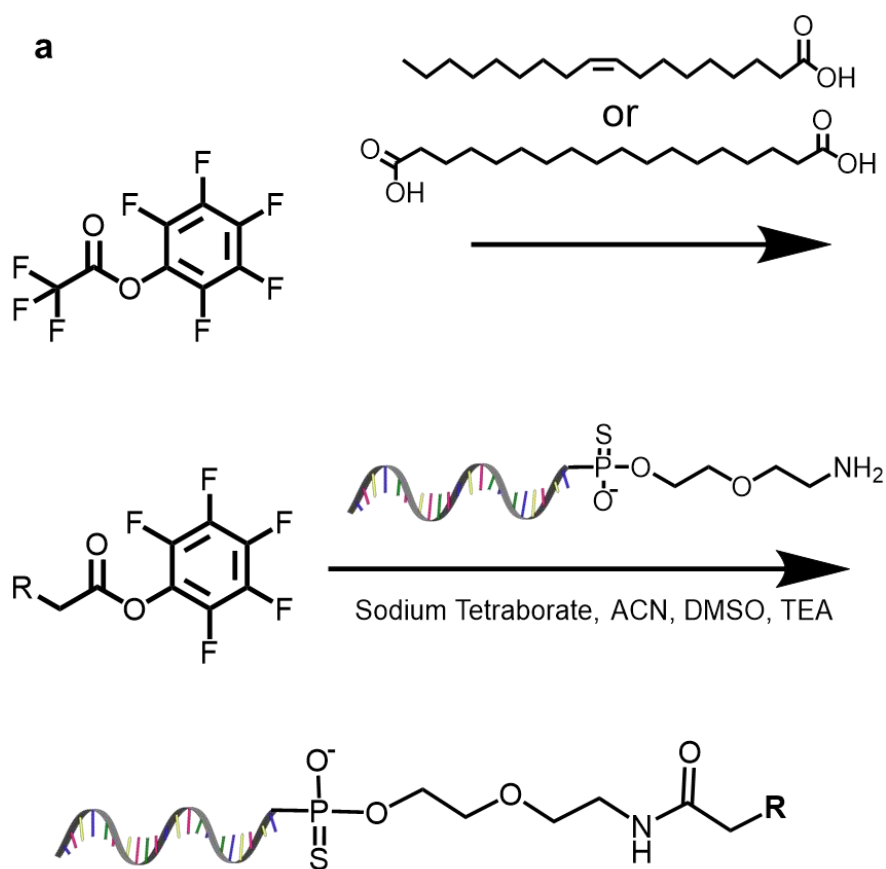

b

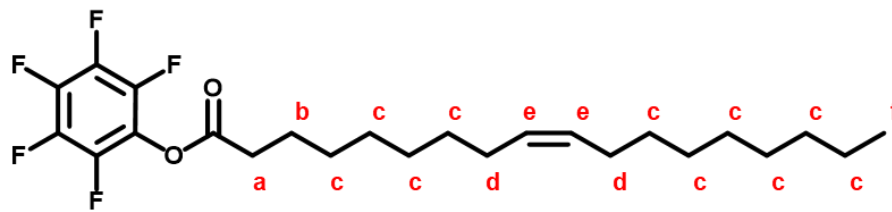

Molecular Weight: 448.52

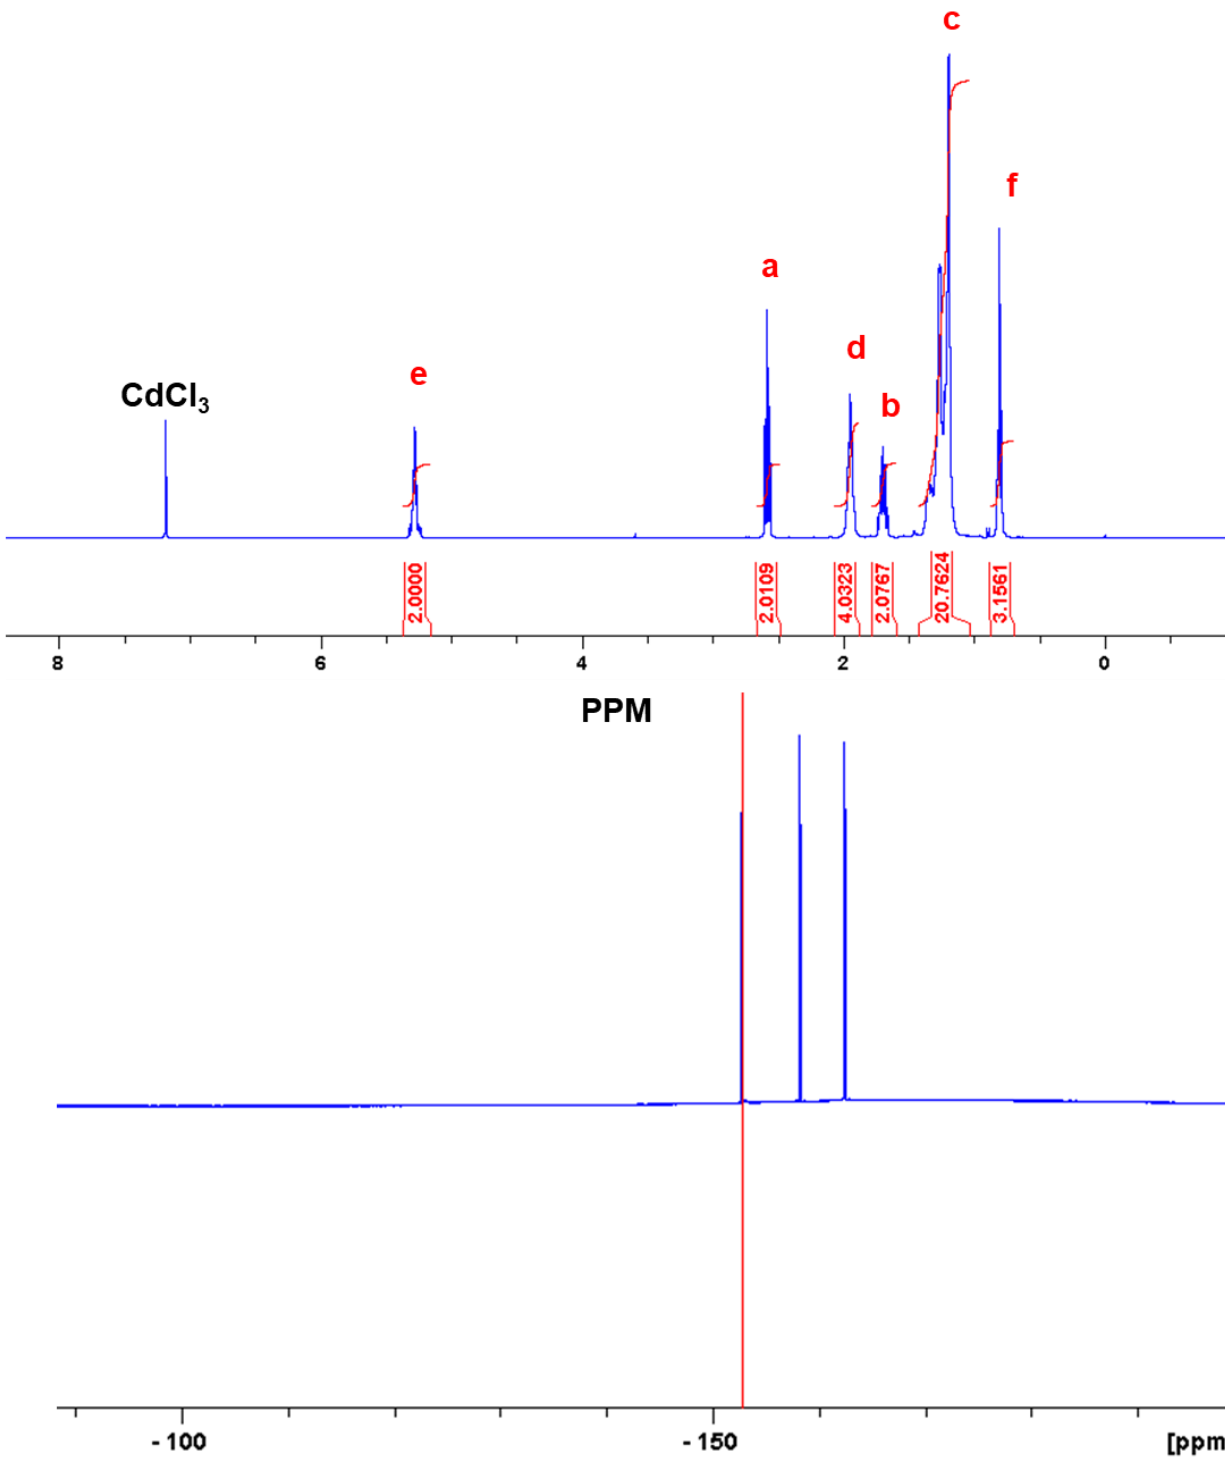

**C**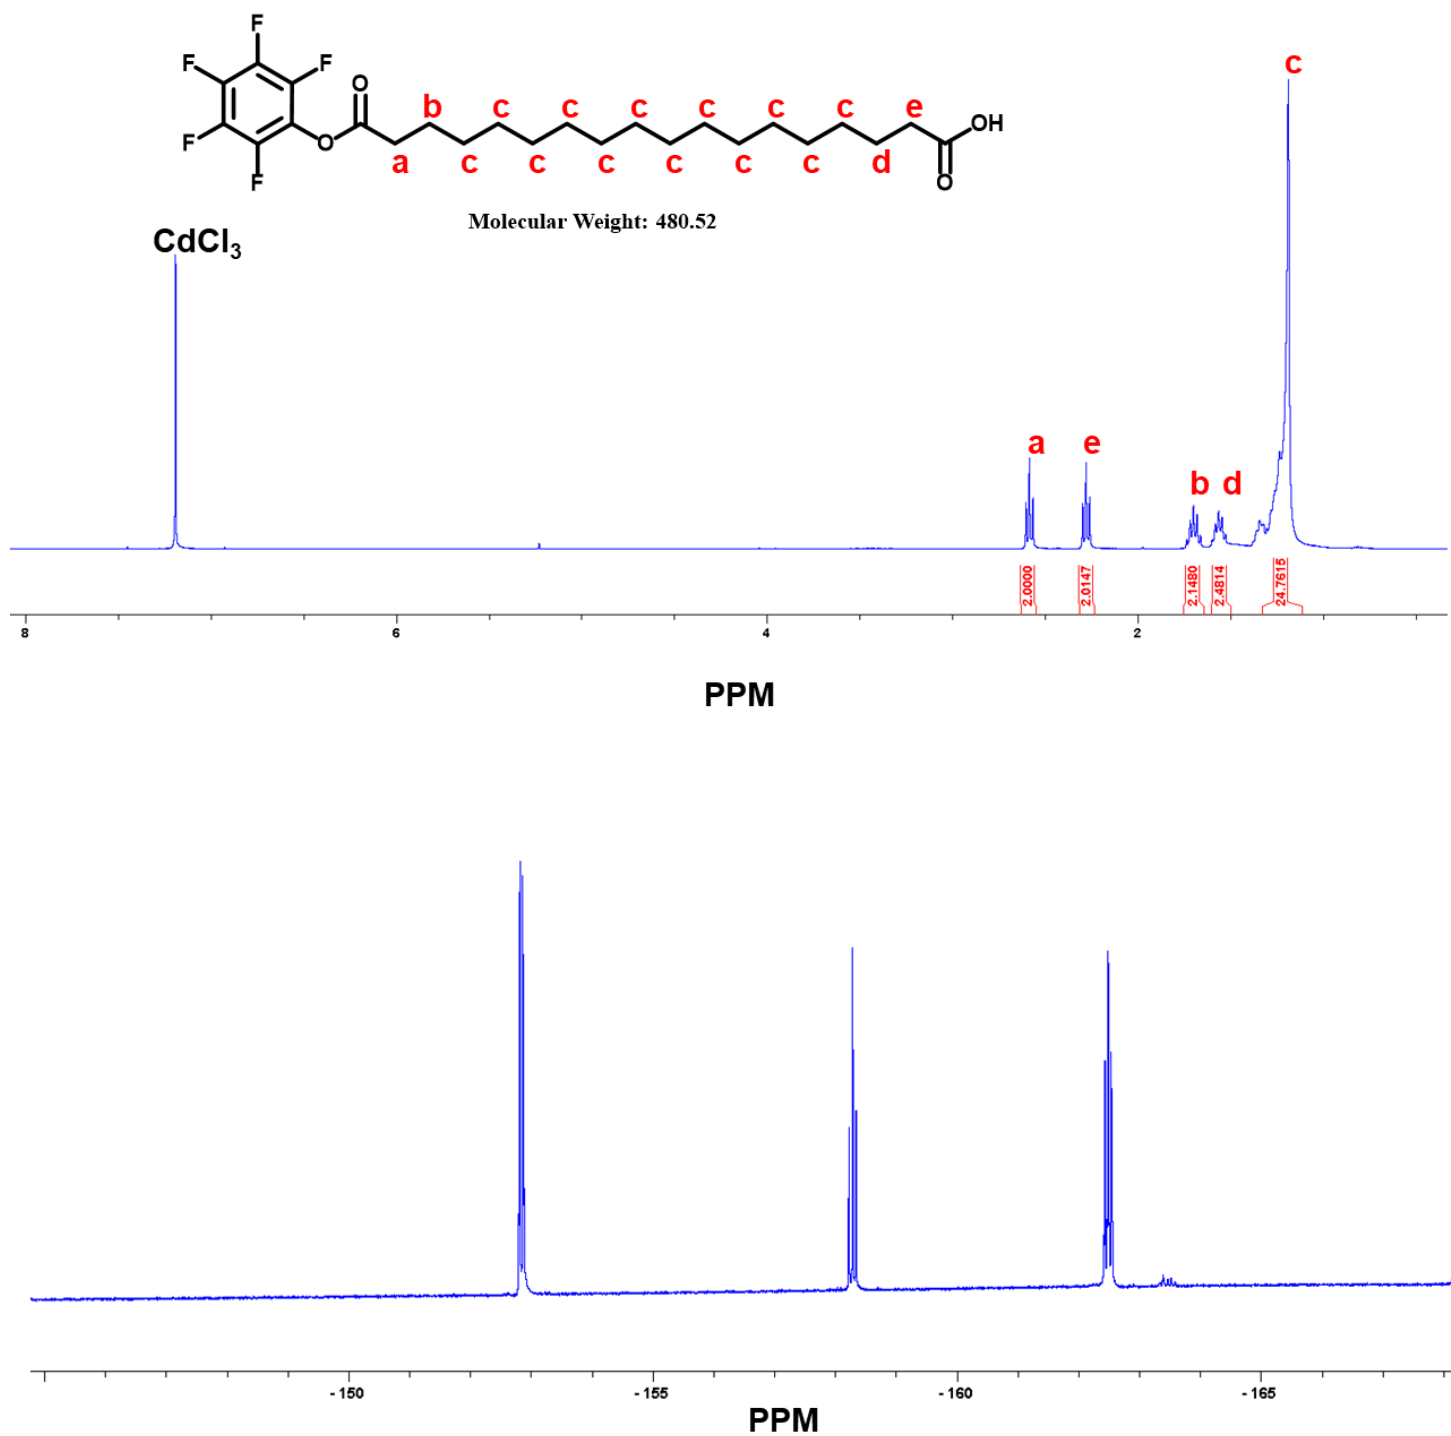

**Supplementary Figure 12: Synthesis of si<(EG<sub>18</sub>L)<sub>2</sub> lipid variants:** (A) Overview of PFPA mediated lipid conjugation with (B) unsaturated lipid and (C) carboxylic acid containing lipid. For each lipid, characterization is shown for <sup>1</sup>H NMR (top panel) and <sup>19</sup>F NMR (bottom panel).

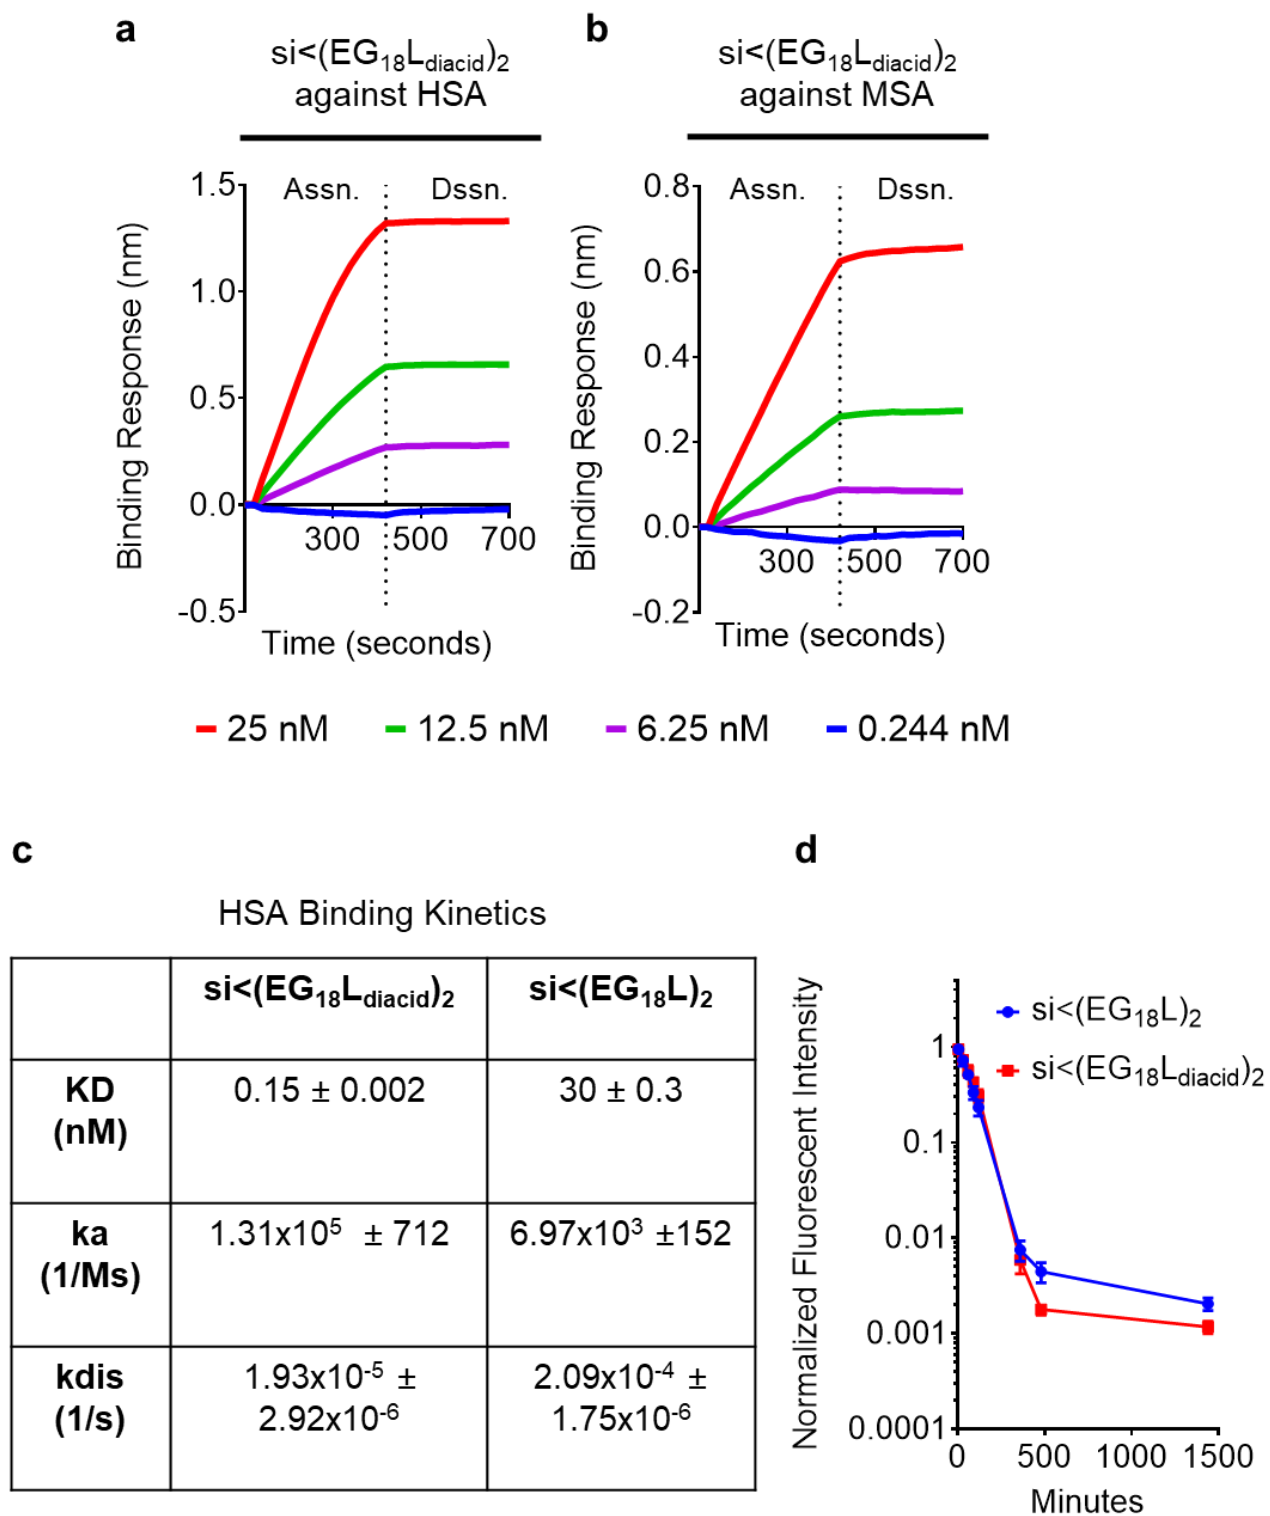

**Supplementary Figure 13: Extended characterization of diacid-modified  $si\langle(EG_{18}L)_2$ .** (A-B) Binding responses to HSA and MSA at varied concentrations measured by biolayer interferometry were used to determine (C) binding kinetic parameters. (D) Mice were injected intravenously with 5 mg/kg of Cy5-labeled siRNA conjugate (n=3-4). At various timepoints, blood was sampled from the contralateral tail vein from injection. Fluorescence was measured from blood samples to determine extended time course PK profiles.

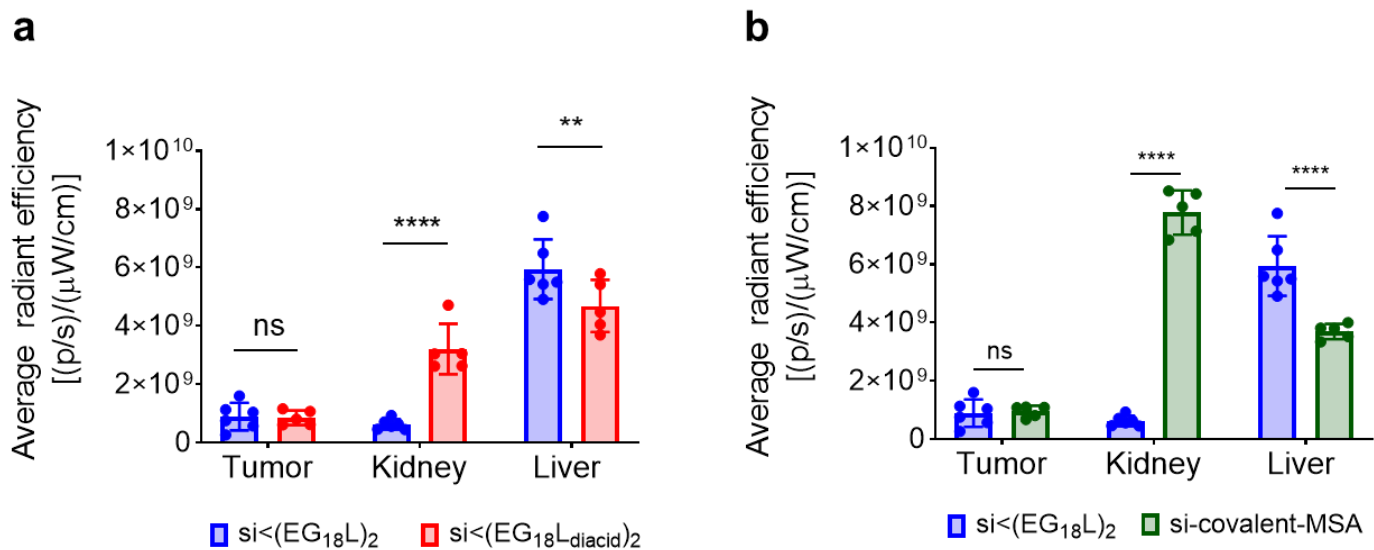

**Supplementary Figure 14: Biodistribution of diacid and covalent siRNA conjugates in tumor bearing mice.** Epifluorescence of whole organs measured by IVIS comparing accumulation of fluorescently labeled (A) si<(EG<sub>18</sub>L-diacid)<sub>2</sub> and (B) si-covalent-MSA to lead conjugate si<(EG<sub>18</sub>L)<sub>2</sub> 18h after i.v. injection of 1 mg/kg siRNA.

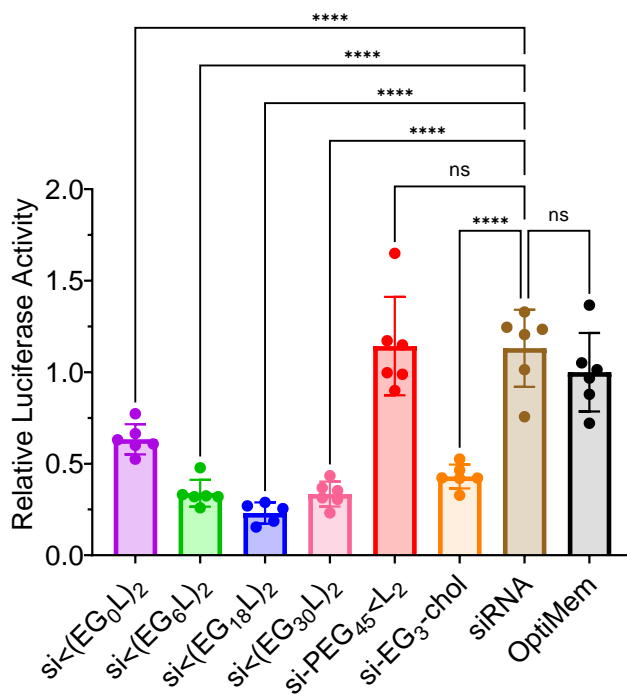

**Supplementary Figure 15: Carrier-free knockdown after 72h treatment with 1 μM siRNA in Luciferase-expressing MDA-MB-231s.** Luminescent signal was normalized to cells treated with OptiMEM alone. Significance assigned using Ordinary one-way ANOVA with Dunnett's multiple comparisons test using siRNA alone as the group for comparison.



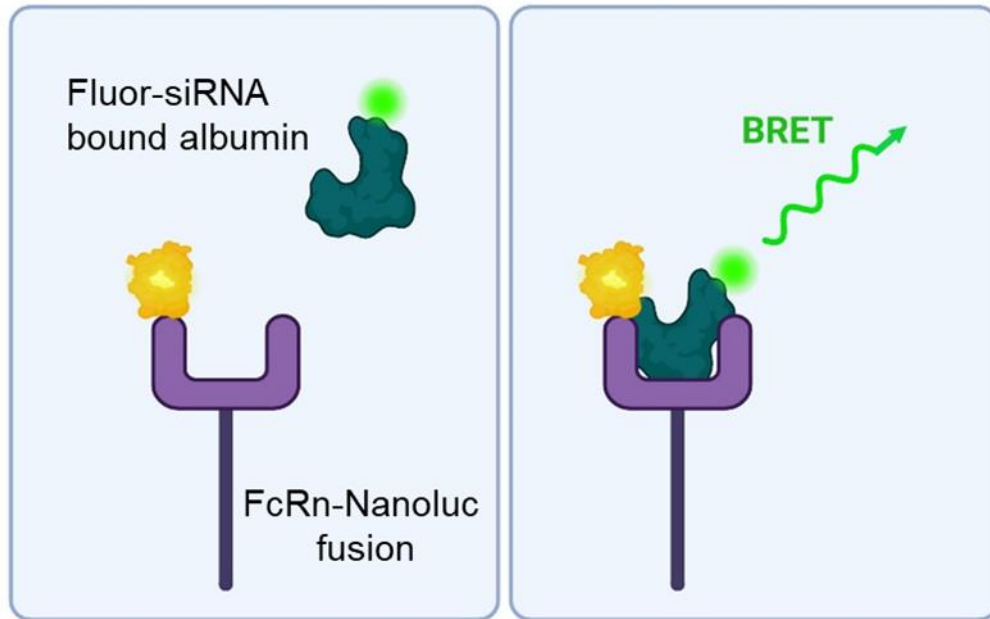

**Supplementary Figure 16:** Schematic representation of NanBRET assay for assessing interactions of albumin bound Cy5-labeled siRNA $\langle$ EG<sub>18</sub>L $\rangle$ <sub>2</sub> with the FcRn.

a

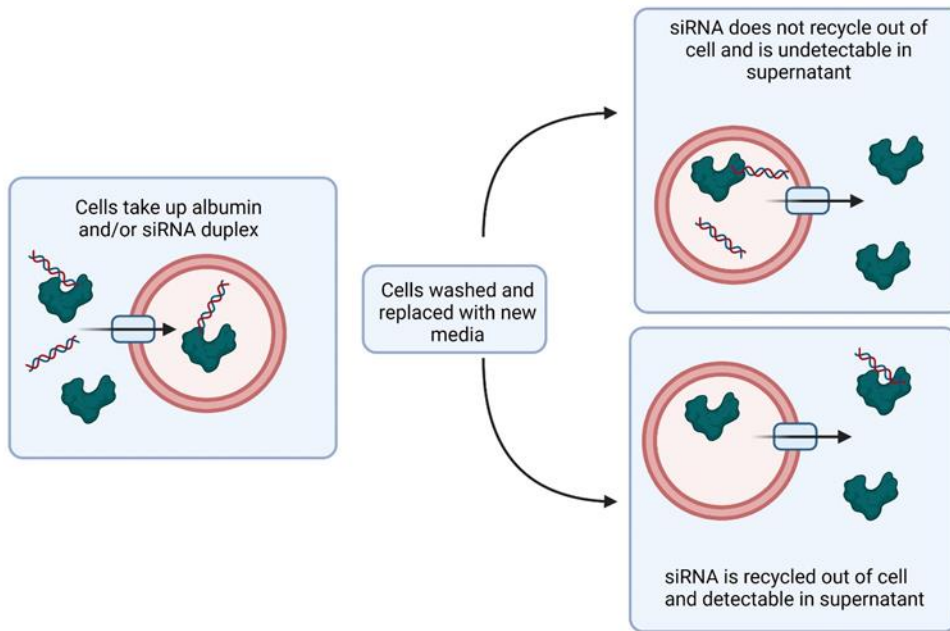

b

### AF488-BSA recycling

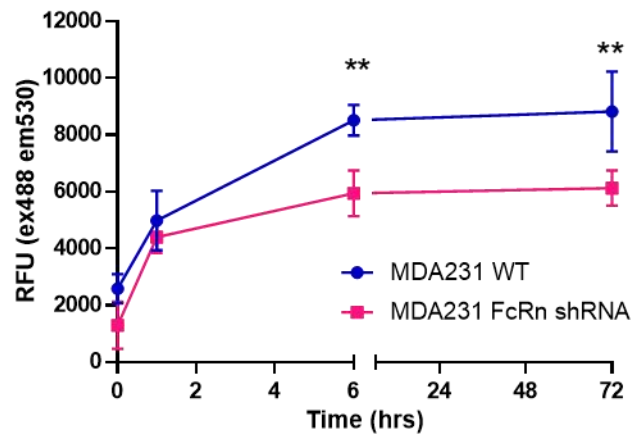

**Supplementary Figure 17:** (A) Schematic representation of study design for measurement of FcRn mediated extracellular recycling of siRNA<sub><(EG<sub>18</sub>L)<sub>2</sub></sub>. (B) Recycling of Alexa488-BSA in either WT or FcRn shRNA MDA-MB-231 cells after treatment at 500 nM for 24h. Fluorescence in media supernatant was measured at 0, 1, 6, and 24h.

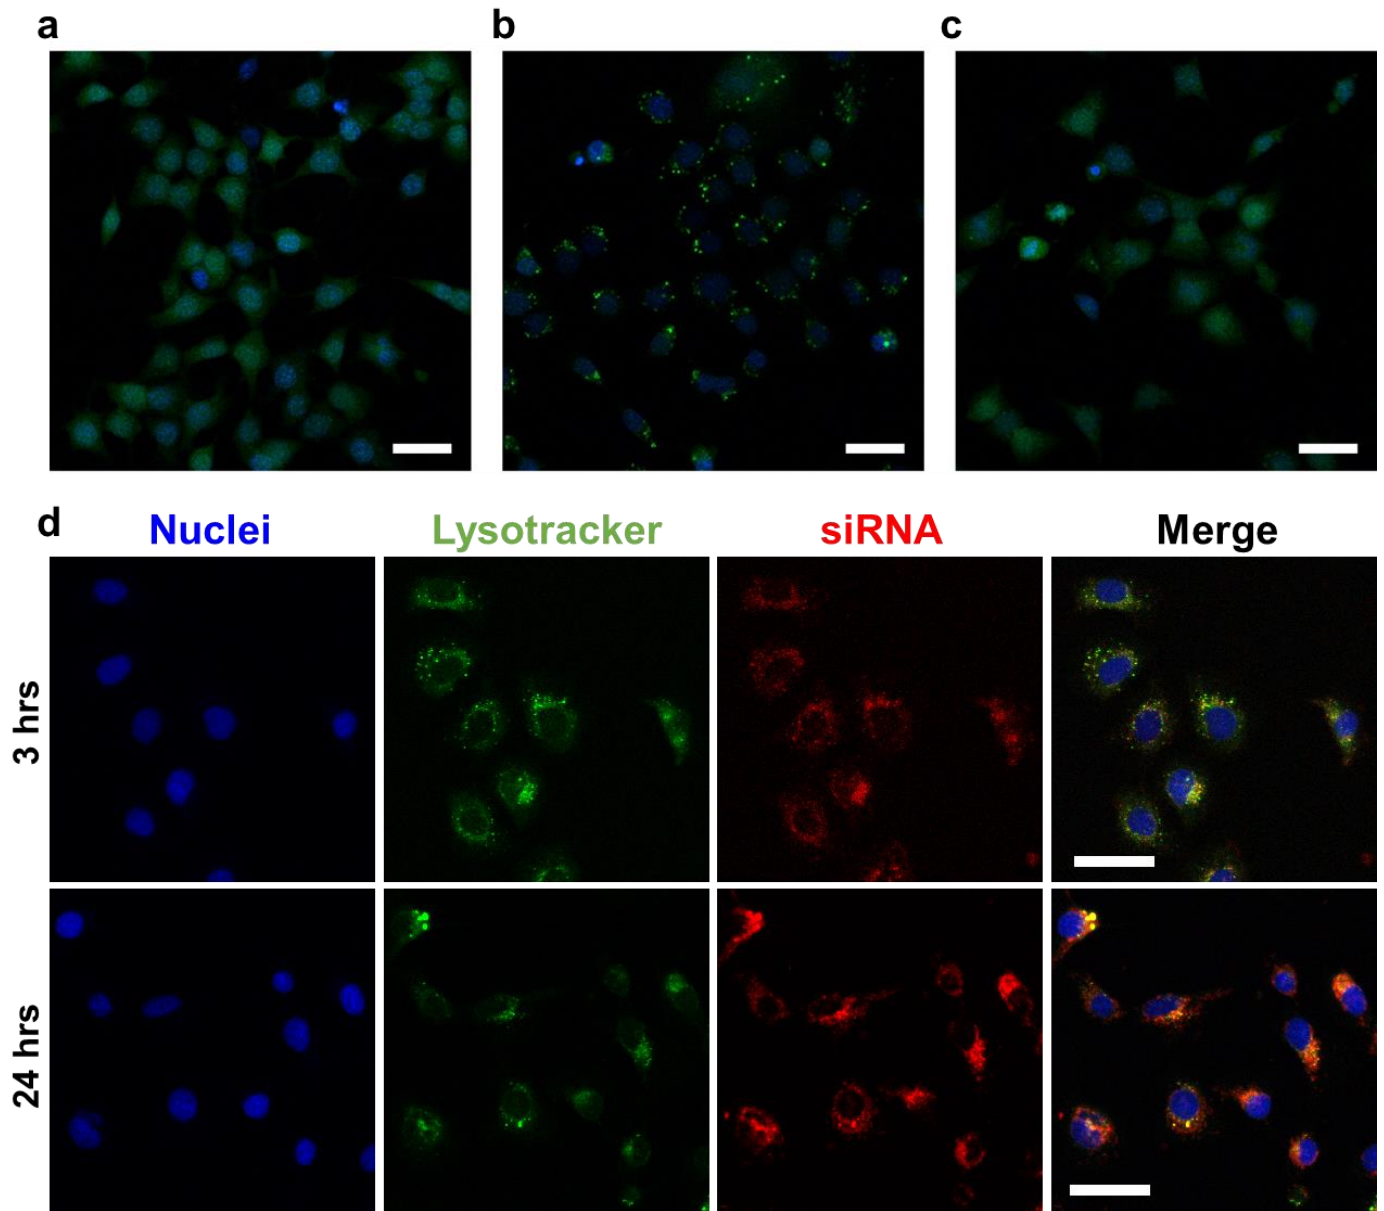

**Supplementary Figure 18:** Representative images of MDA-MB-231 cells expressing YFP-Gal8 after 18h treatment with (A) media only, (B) lipofectamine (positive control), or (C) si<(EG<sub>18</sub>L)<sub>218</sub>L)<sub>2</sub>

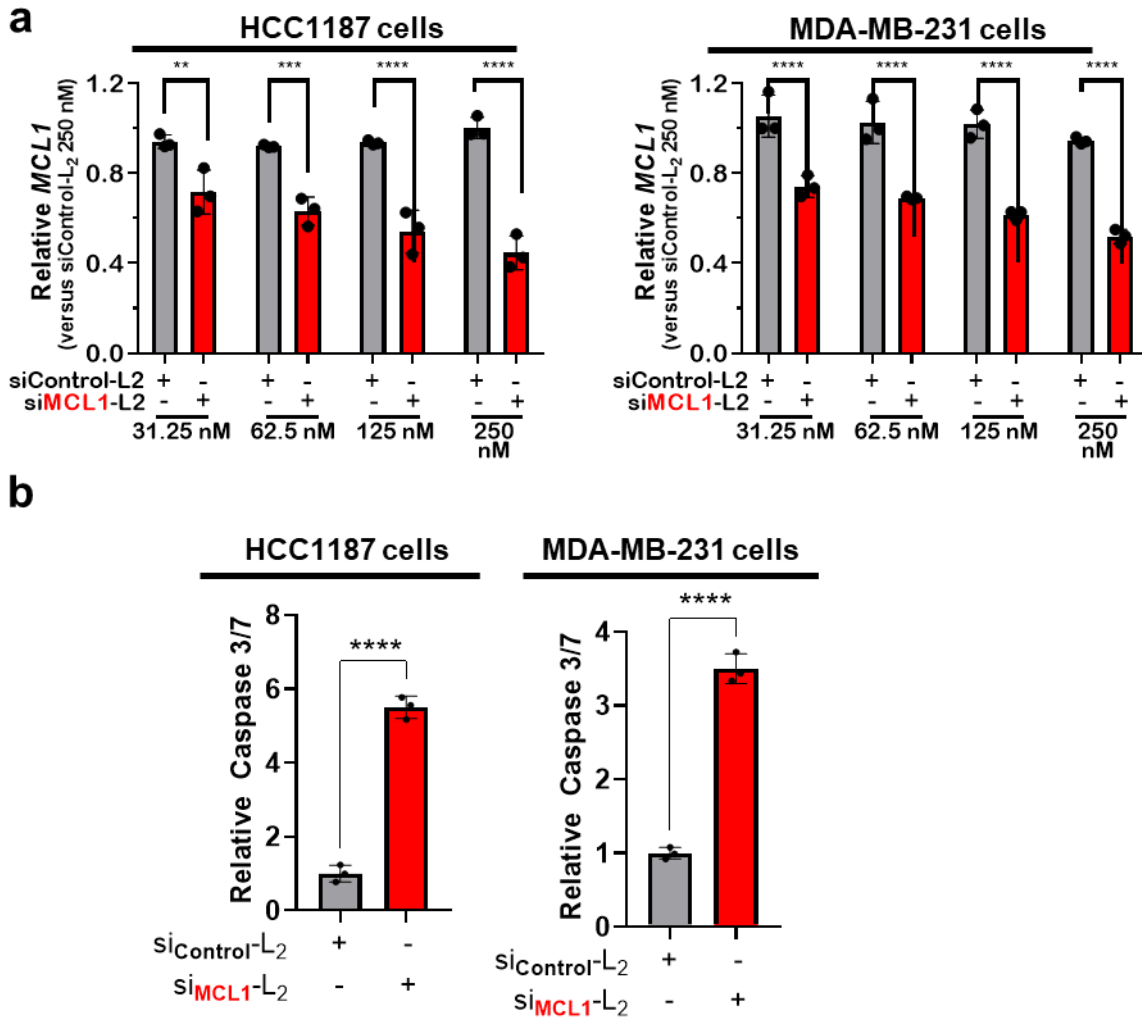

**Supplementary Figure 19:** (A) HCC1187 and MDA-MB-231 cells were treated in serum-free OptiMEM with siRNA-lipid conjugates and assessed 48 h post-treatment for expression of MCL1 transcript levels, corrected for expression of the housekeeping gene PPIB. Results are shown relative to *MCL1* levels seen in siControl-L<sub>2</sub> (250 nM)-treated cells. Significance determined by 2-way ANOVA with Sidak's multiple comparisons test (n=3). (B) HCC1187 and MDA-MB-231 cells treated with siRNA-lipid conjugates for 96 h at 250 nM were assessed using Caspase 3/7-Glo. Significance determined by unpaired t-test (n=3).

**a**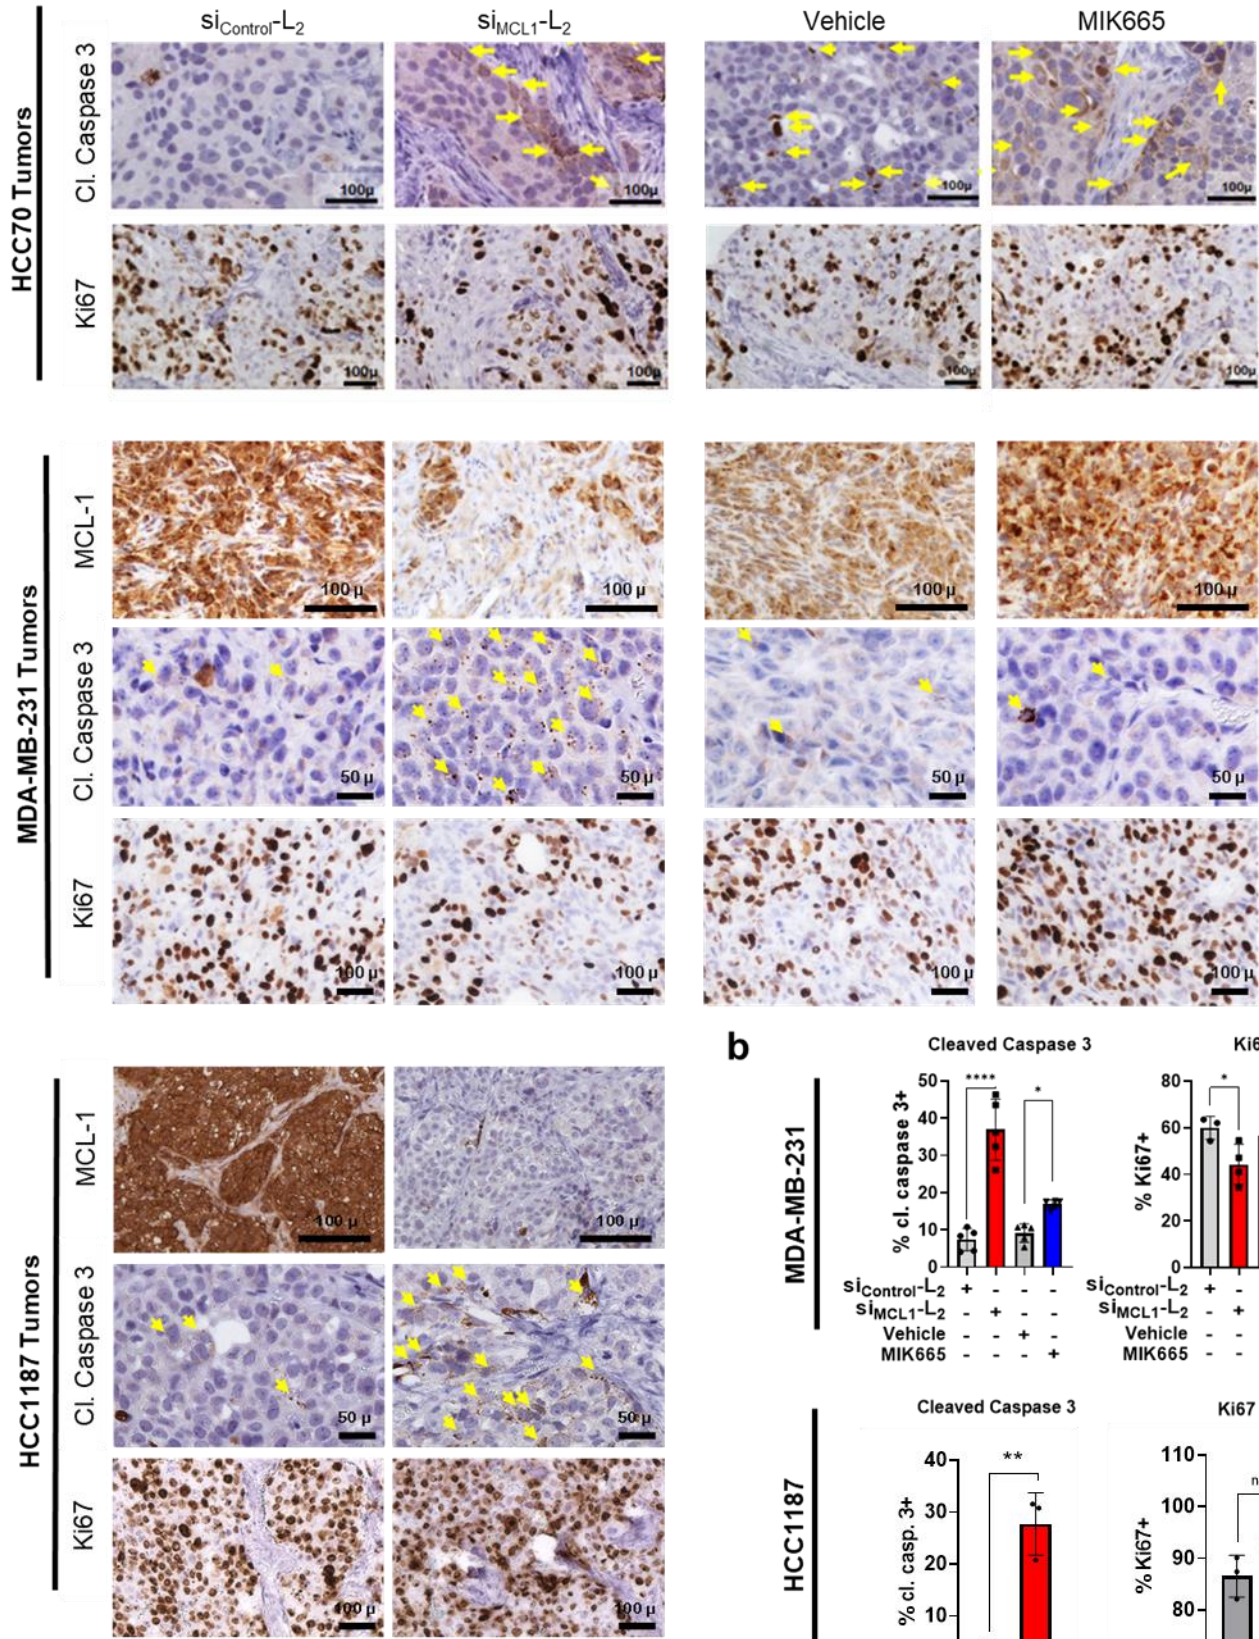

**Supplementary Figure 20:** (A) Mice bearing orthotopic HCC70, HCC1187, or MDA-MB-231 tumors were treated on day 0 and day 7 with si<sub>Control</sub>-L<sub>2</sub> or si<sub>MCL1</sub>-L<sub>2</sub> (10 mg/kg, delivered i.v.). Tumors were collected on day

8. N = 3-4. Representative images of immunohistochemical staining for cleaved caspase 3, Ki67, and MCL-1 are shown. (B) Quantification of the percentage of HCC1187 and MDA-MB-231 tumor cells staining positive for Ki67 and cleaved (cl.) caspase is shown. (HCC70 quantitation is shown in Figure 9). MDA-MB-231 study results were analyzed for significance using 1-way ANOVA with Tukey's multiple comparisons test (n=3-5). HCC1187 study results were analyzed for significance using an unpaired t-test (n=3).

a

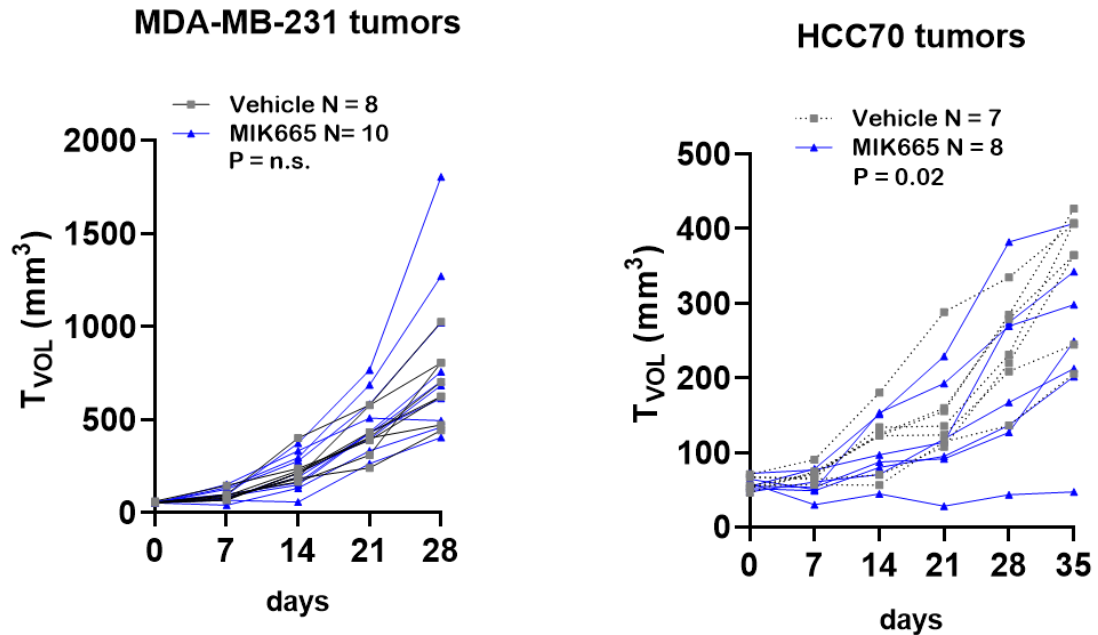

b

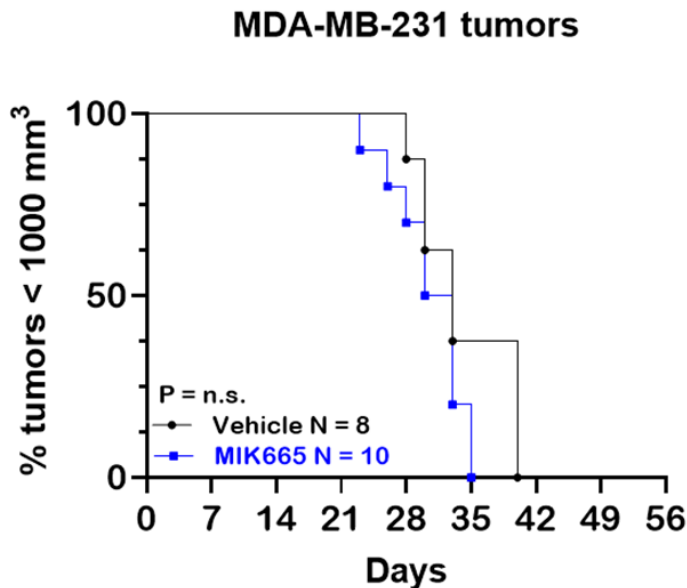

**Supplementary Figure 21:** Mice harboring HCC70 (N = 7-8) and MDA-MB-231 (N = 8-10) orthotopic tumors (50 -100 mm<sup>3</sup>) received once weekly doses of vehicle (used for delivery of MIK665), or MIK665 through day 28 by i.v. injection. Tumors were collected on day 35 (HCC70) or day 56 (MDA-MB-231) or earlier if tumors ulcerated or exceeded humane size limitations. (A) Tumor volumes were measured throughout treatment. Statistical values were calculated based on area under the curve. (B) Kaplan-Meier analysis of tumor bearing

mice, defining survival as tumor volume under 1000 mm<sup>3</sup>. P values are calculated using the log-rank (Mantel-Cox) test.
